# Supplementary material for: Less Cytotoxic Protoflavones as Antiviral Agents: Protoapigenone 1′-O-isopropyl ether Shows Improved Selectivity Against the Epstein–Barr Virus Lytic Cycle
Source: PubMed Central journal article supplement (PMC6940897; doi:10.3390/ijms20246269), 2019-12-12
Supplement: ijms-20-06269-s001.pdf [file ijms-20-06269-s001.pdf]

**Less cytotoxic protoflavones as antiviral agents:  
protoapigenone 1'-*O*-isopropyl ether shows improved  
selectivity against the Epstein-Barr virus lytic cycle**

Supporting information

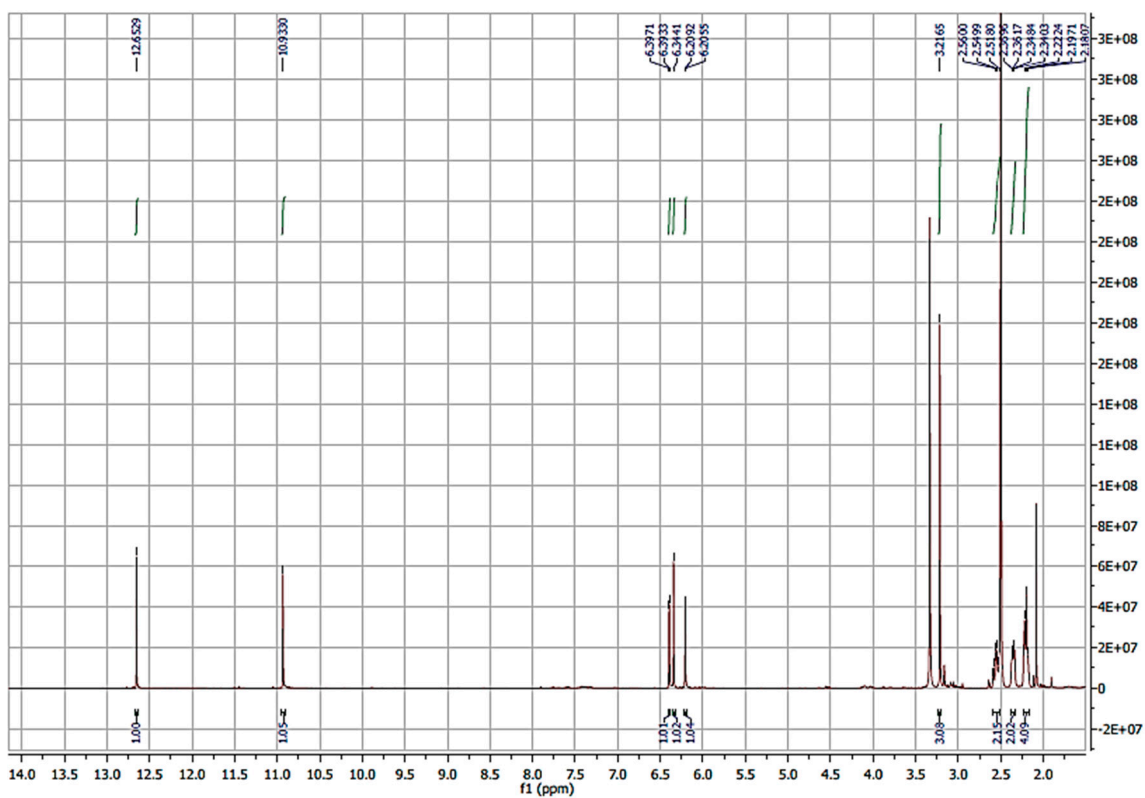

Figure S1.  $^1\text{H}$  NMR (500 MHz,  $\text{DMSO}-d_6$ ) spectrum of compound 10.

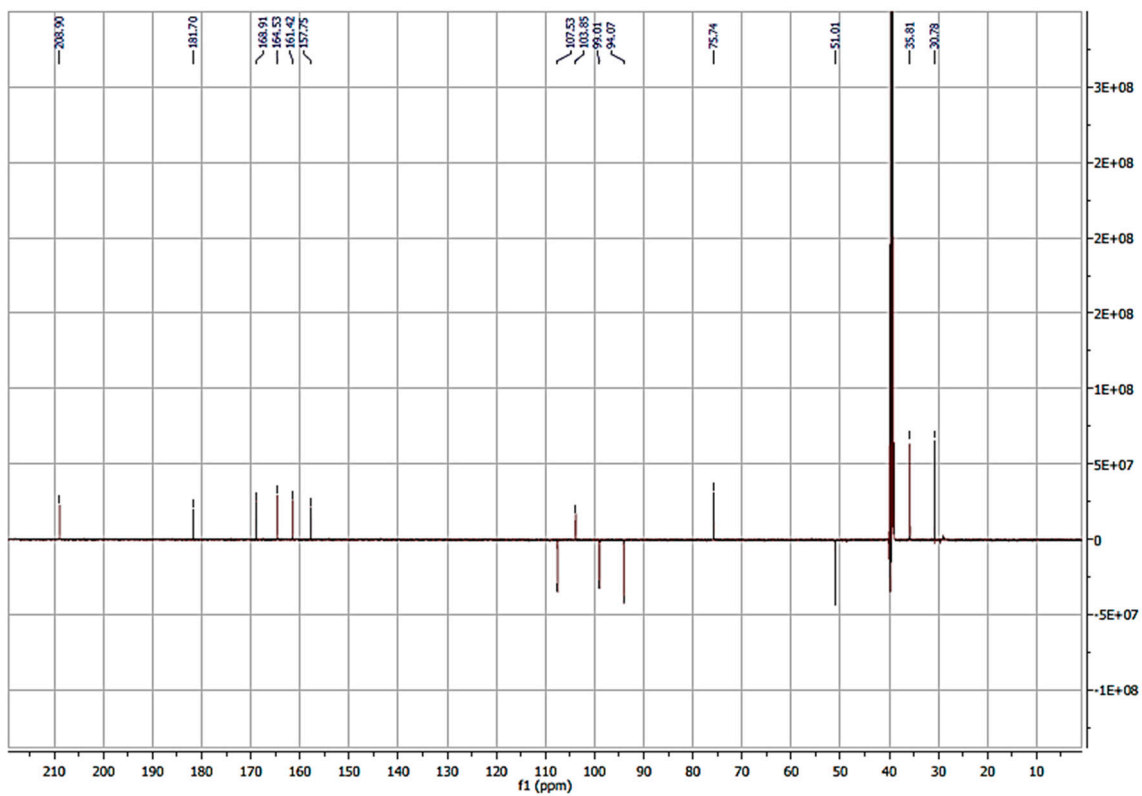

Figure S2. JMOD (125 MHz,  $\text{DMSO}-d_6$ ) spectrum of compound 10.

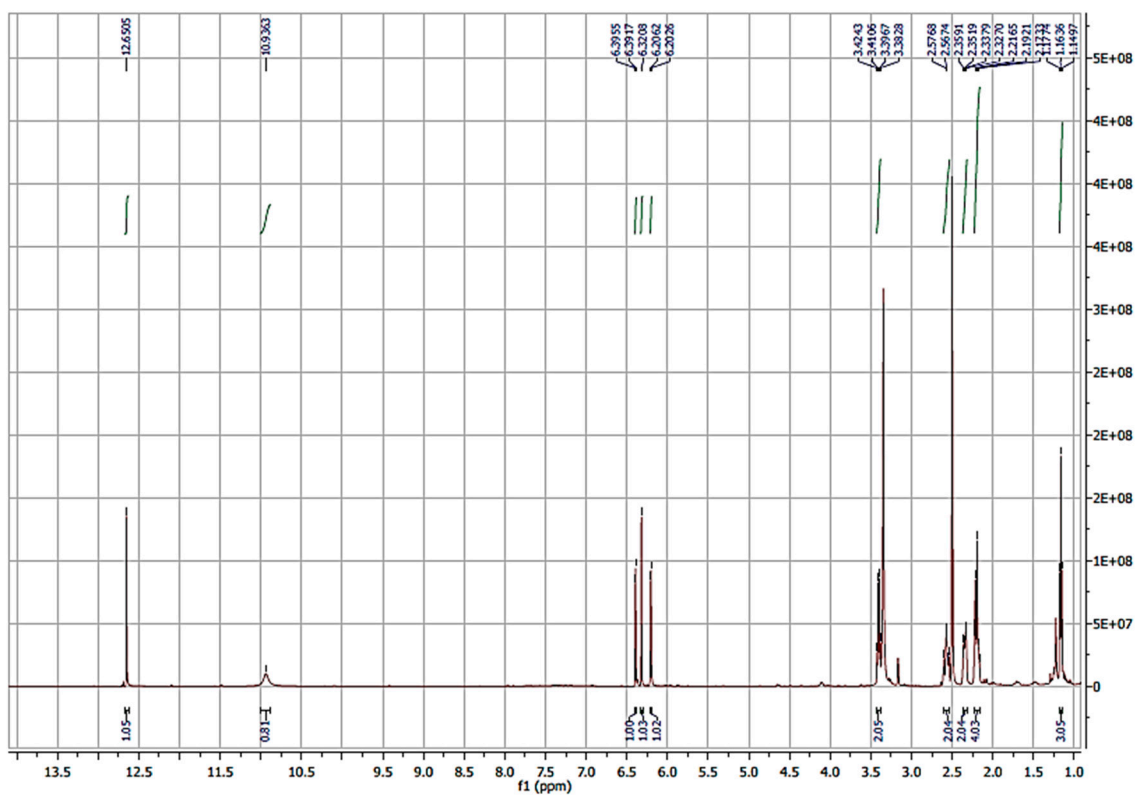

Figure S3.  $^1\text{H}$  NMR (500 MHz,  $\text{DMSO-}d_6$ ) spectrum of compound 11.

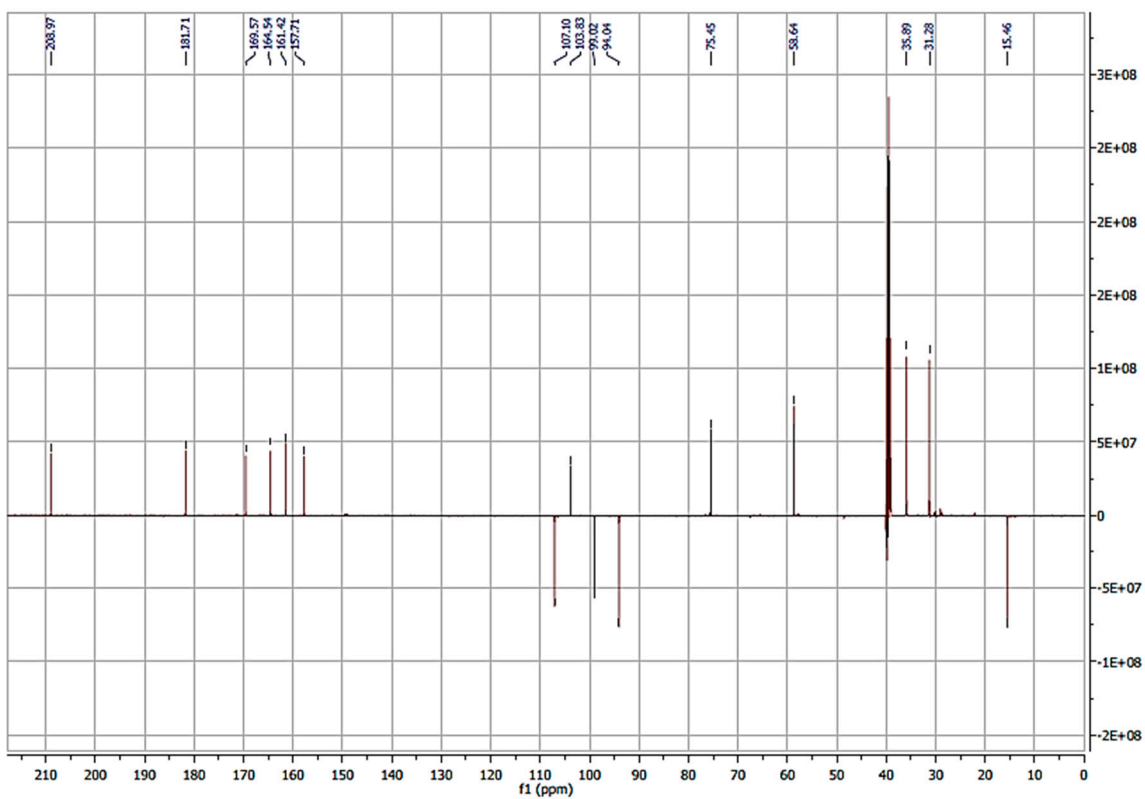

Figure S4. JMOD (125 MHz,  $\text{DMSO-}d_6$ ) spectrum of compound 11.

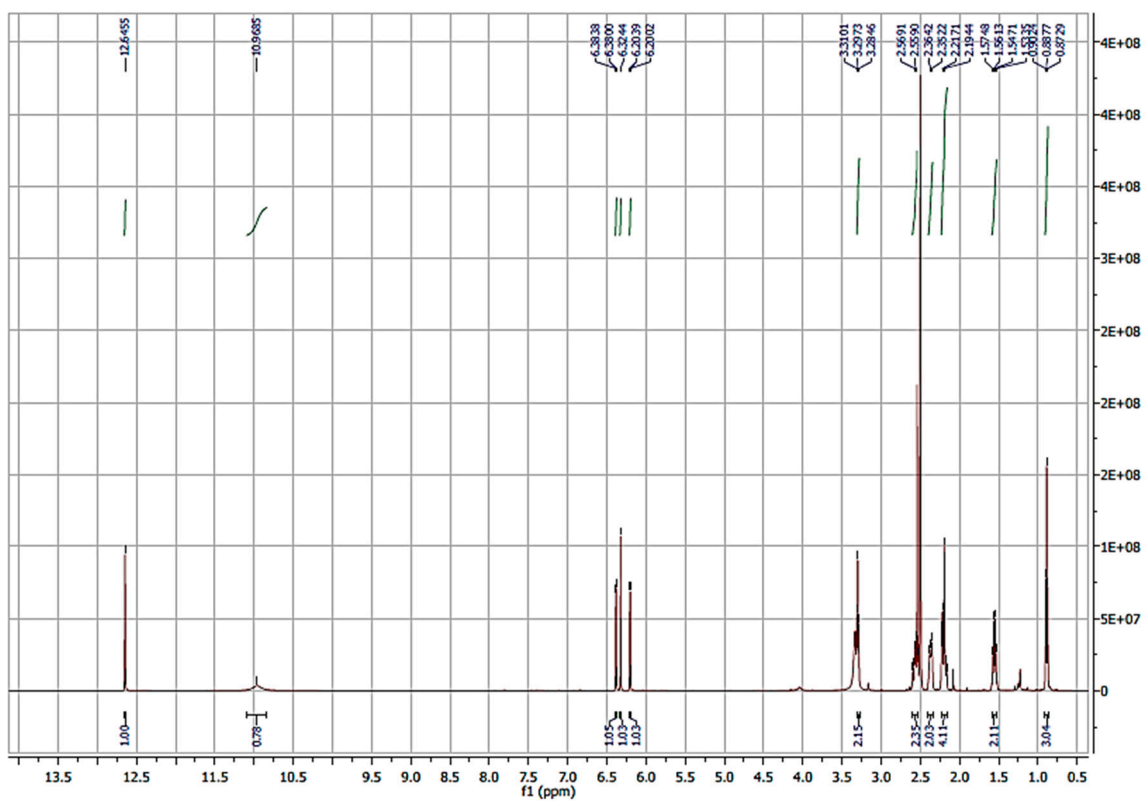

Figure S5.  $^1\text{H}$  NMR (500 MHz,  $\text{DMSO}-d_6$ ) spectrum of compound 12.

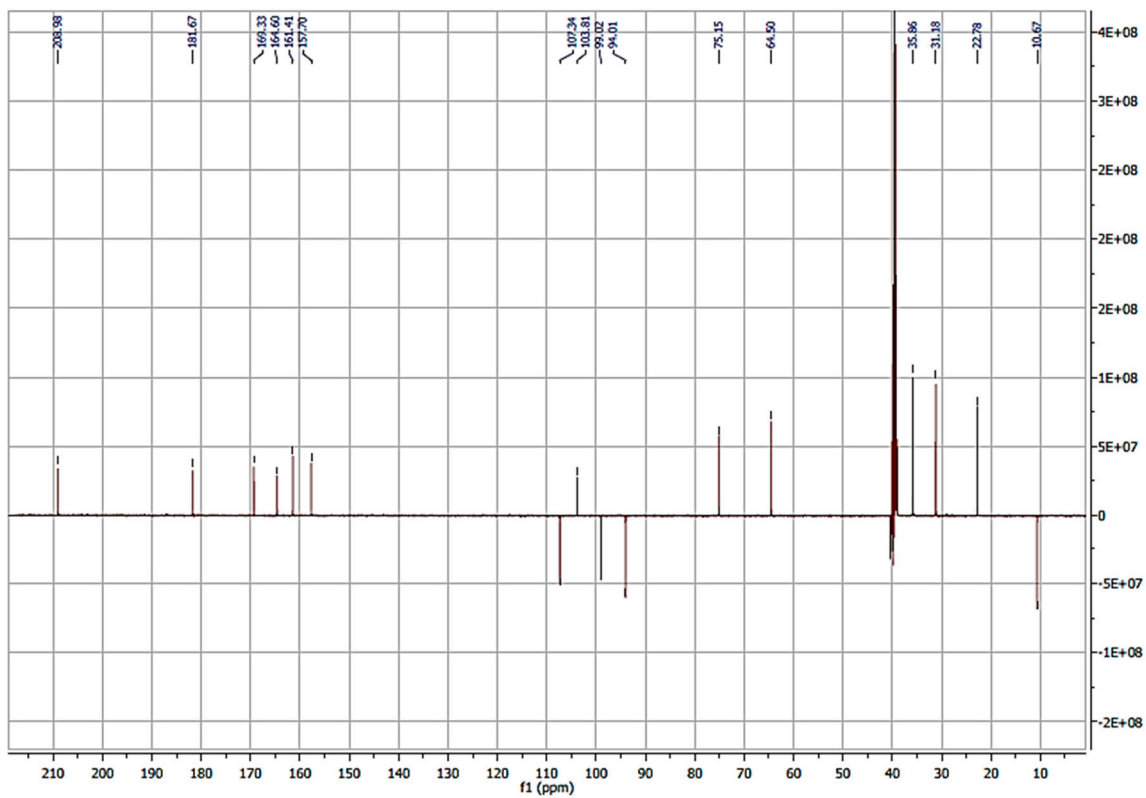

Figure S6. JMOD (125 MHz,  $\text{DMSO}-d_6$ ) spectrum of compound 12.

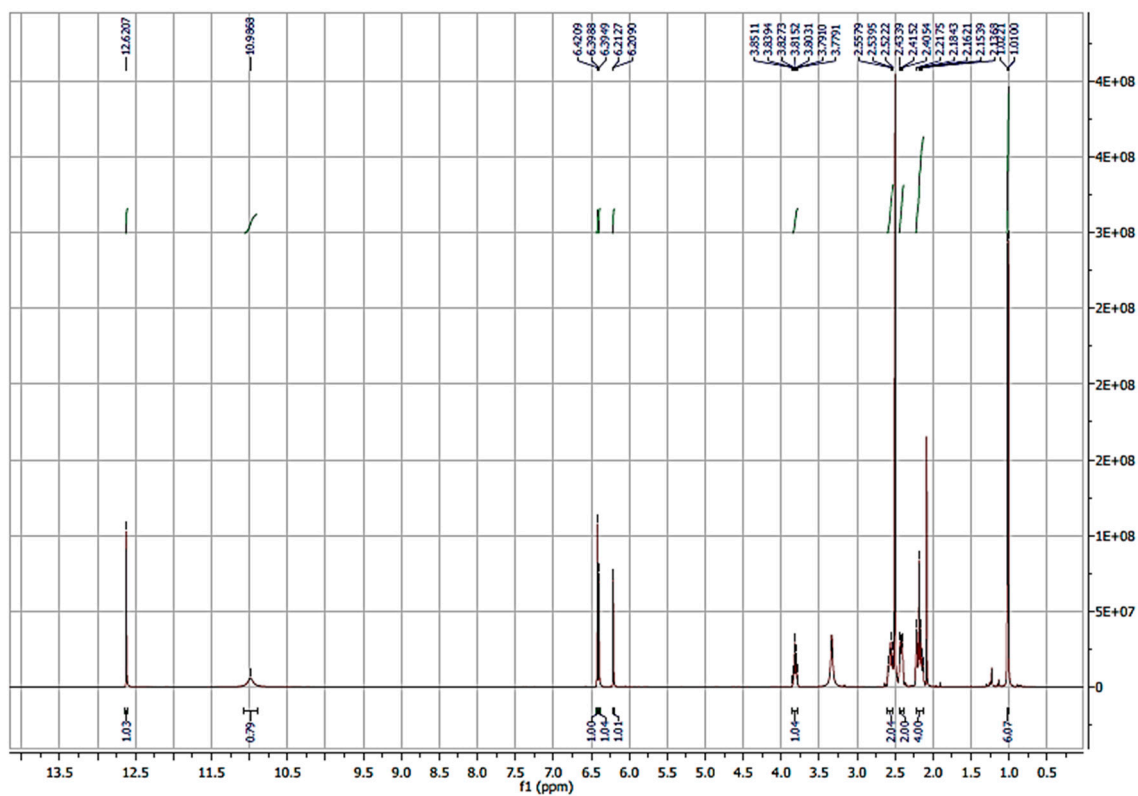

Figure S7.  $^1\text{H}$  NMR (500 MHz,  $\text{DMSO-}d_6$ ) spectrum of compound 13.

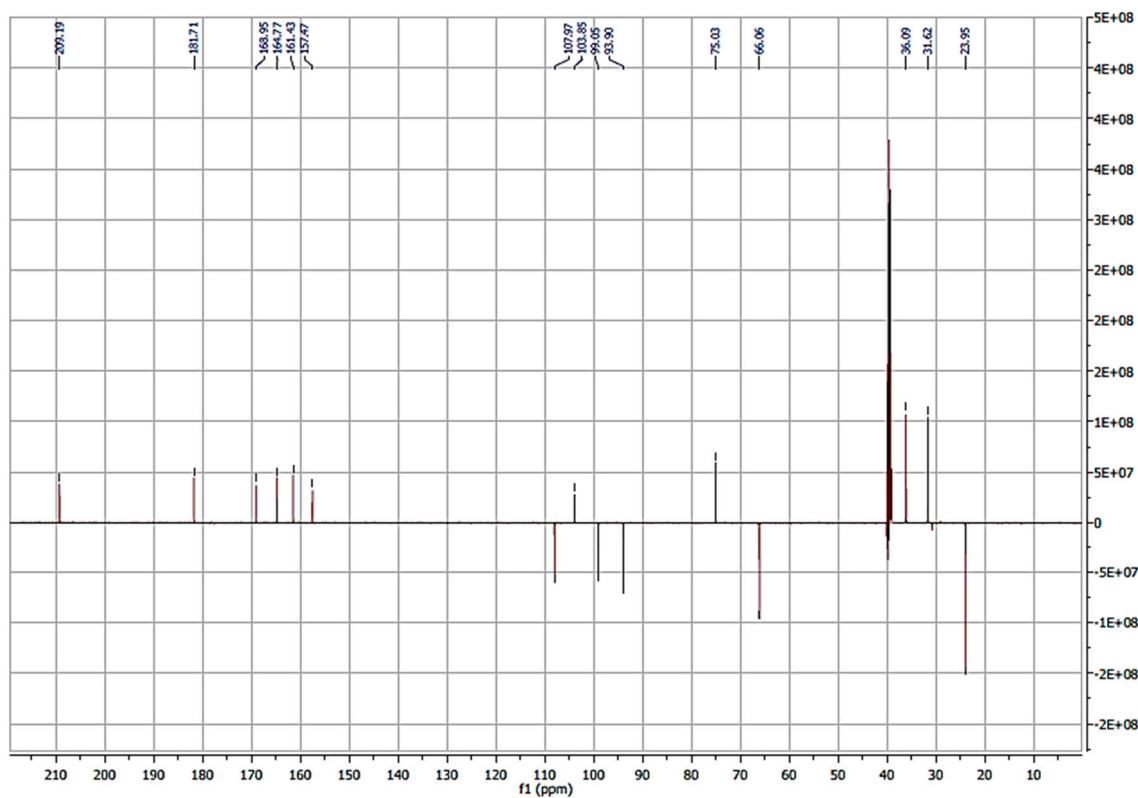

Figure S8. JMOD (125 MHz,  $\text{DMSO-}d_6$ ) spectrum of compound 13.

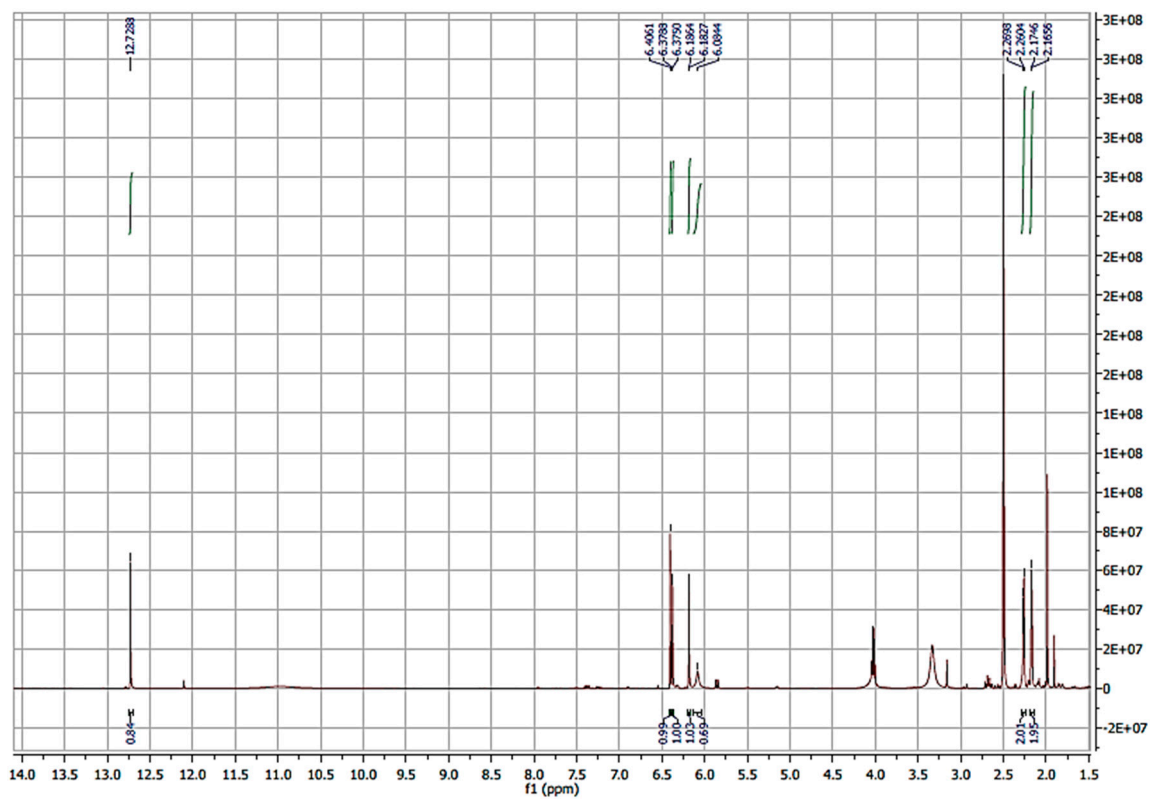

Figure S9.  $^1\text{H}$  NMR (500 MHz,  $\text{DMSO-}d_6$ ) spectrum of compound 15.

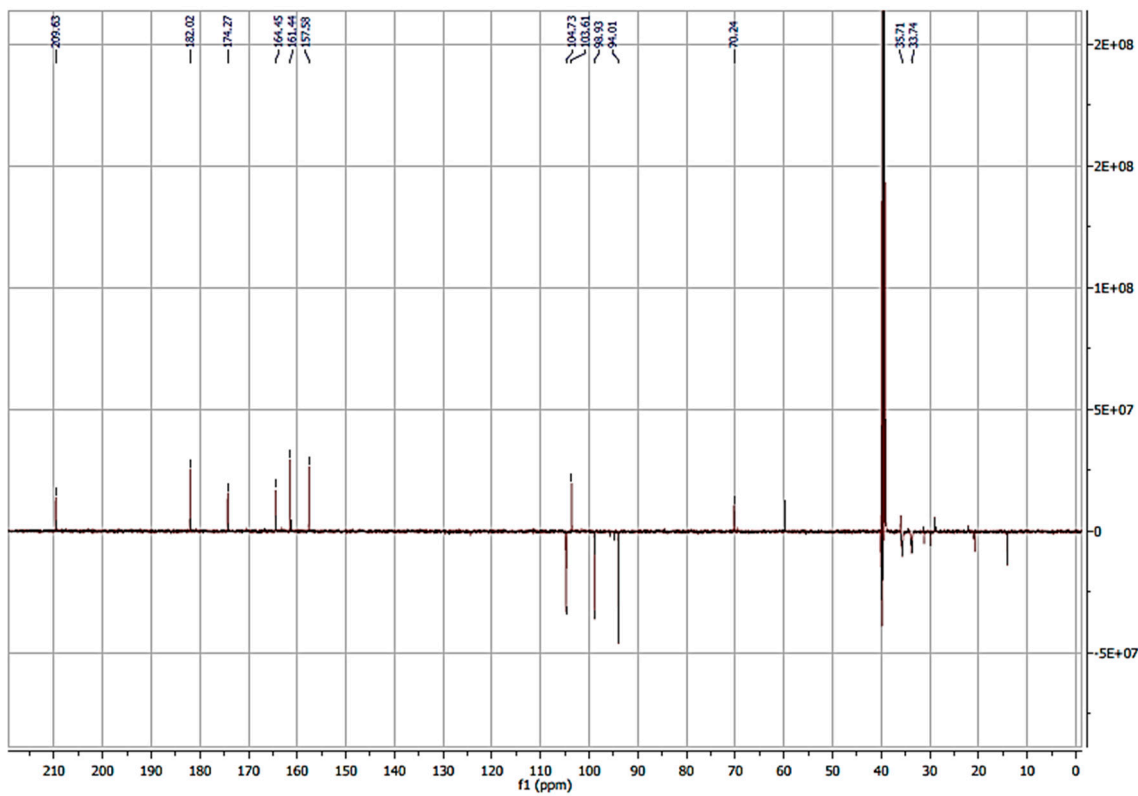

Figure S10. JMOD (125 MHz,  $\text{DMSO-}d_6$ ) spectrum of compound 15.

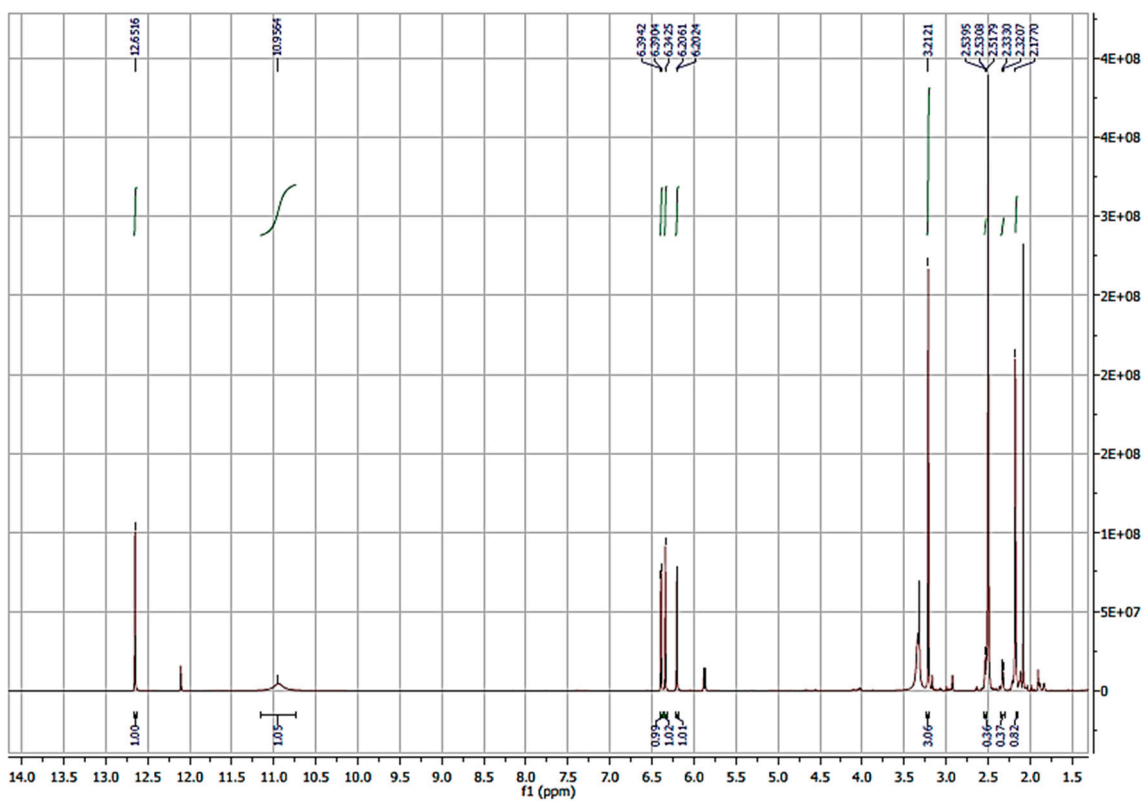

Figure S11.  $^1\text{H}$  NMR (500 MHz,  $\text{DMSO-}d_6$ ) spectrum of compound 16.

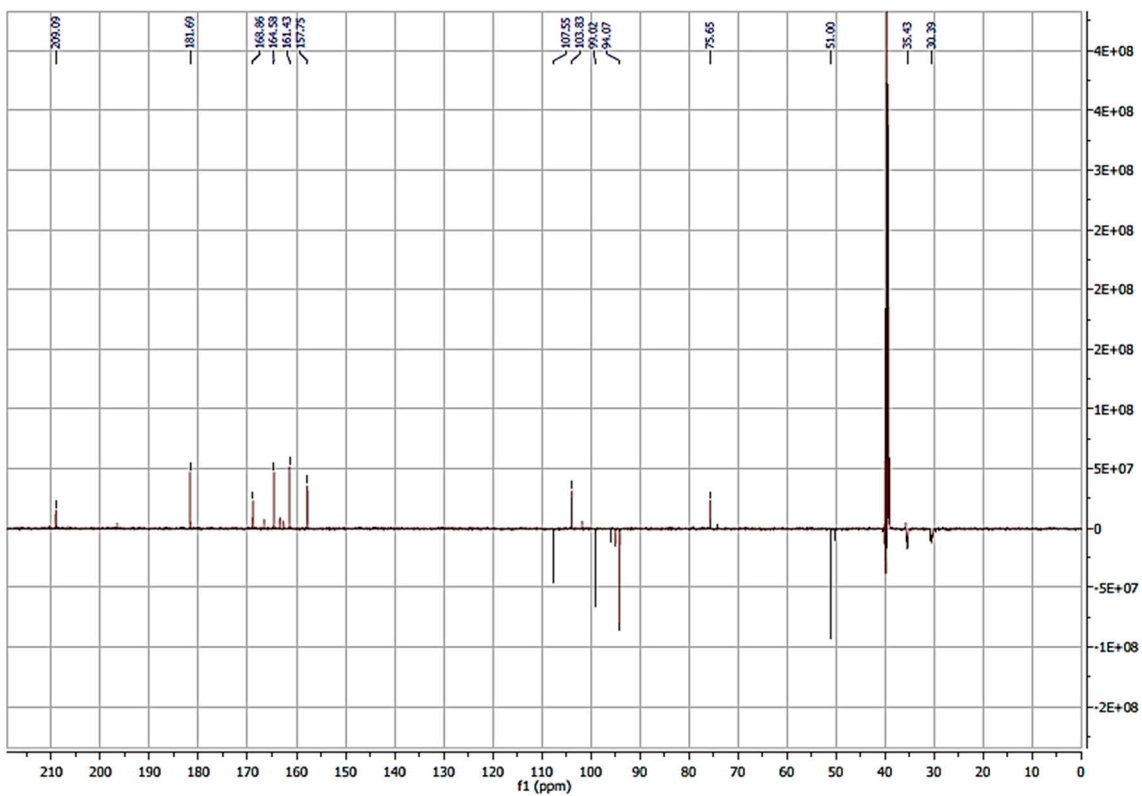

Figure S12. JMOD (125 MHz,  $\text{DMSO-}d_6$ ) spectrum of compound 16.

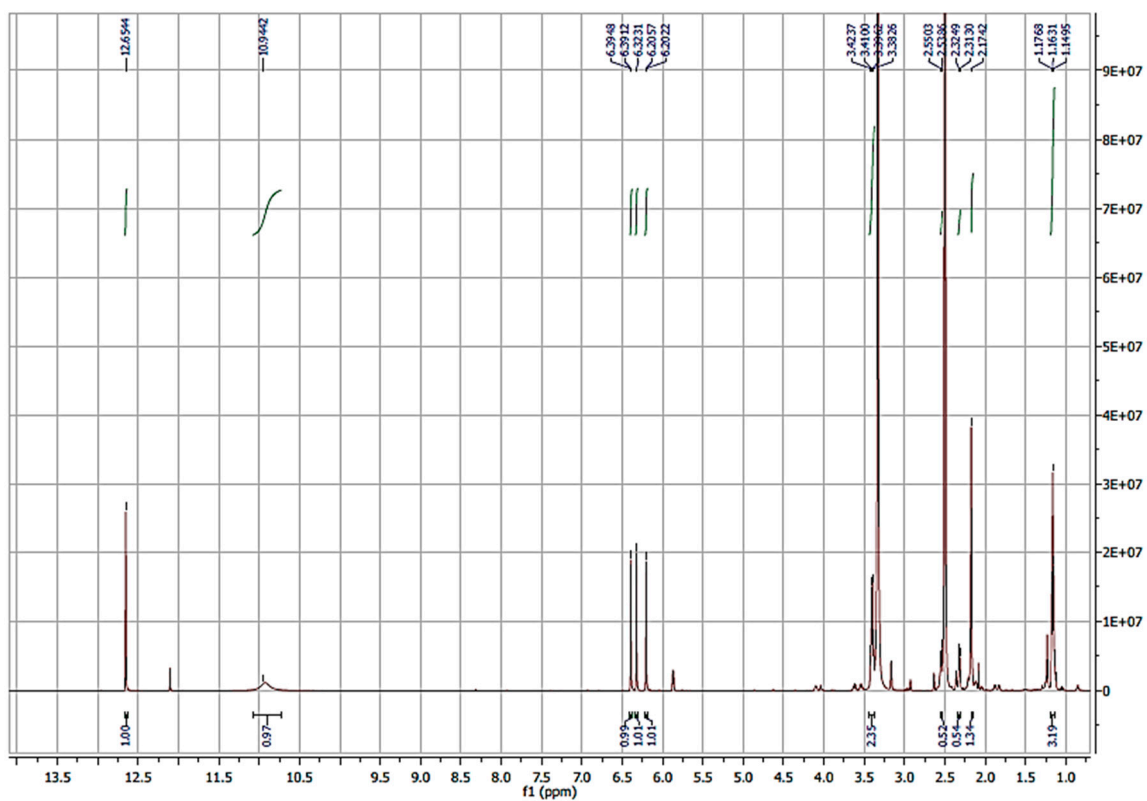

Figure S13.  $^1\text{H}$  NMR (500 MHz,  $\text{DMSO-}d_6$ ) spectrum of compound 17.

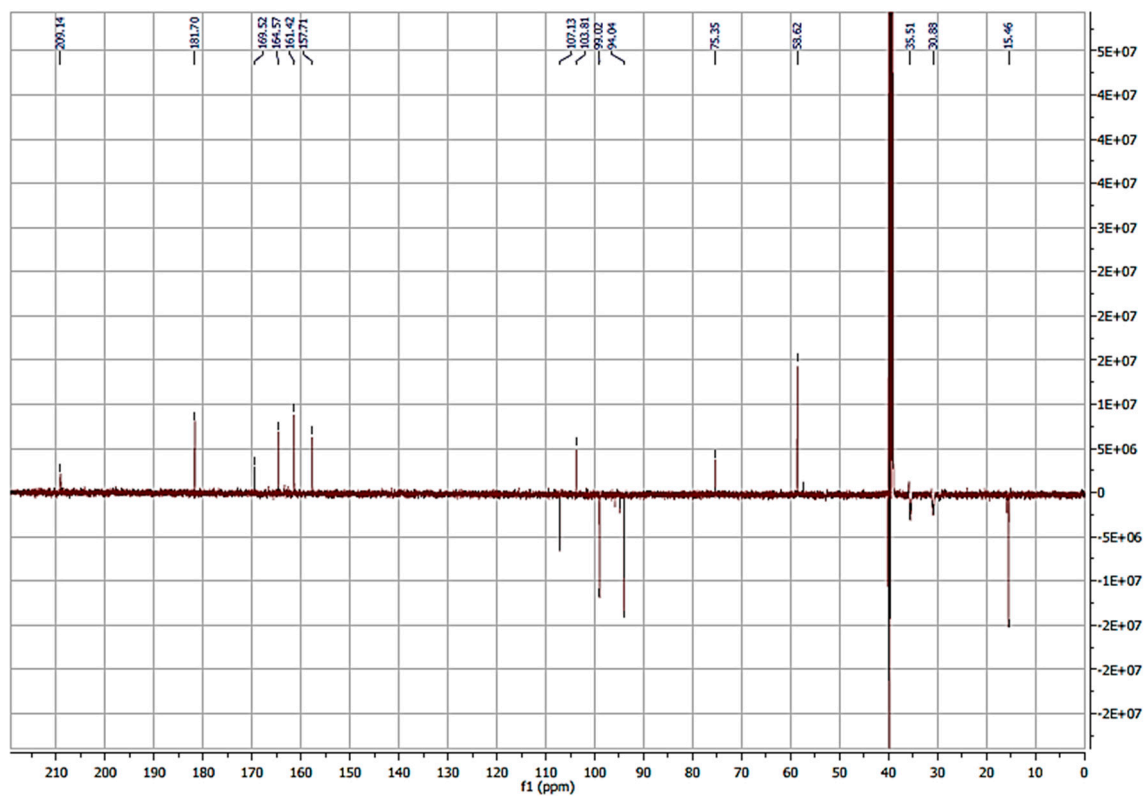

Figure S14. JMOD (125 MHz,  $\text{DMSO-}d_6$ ) spectrum of compound 17.



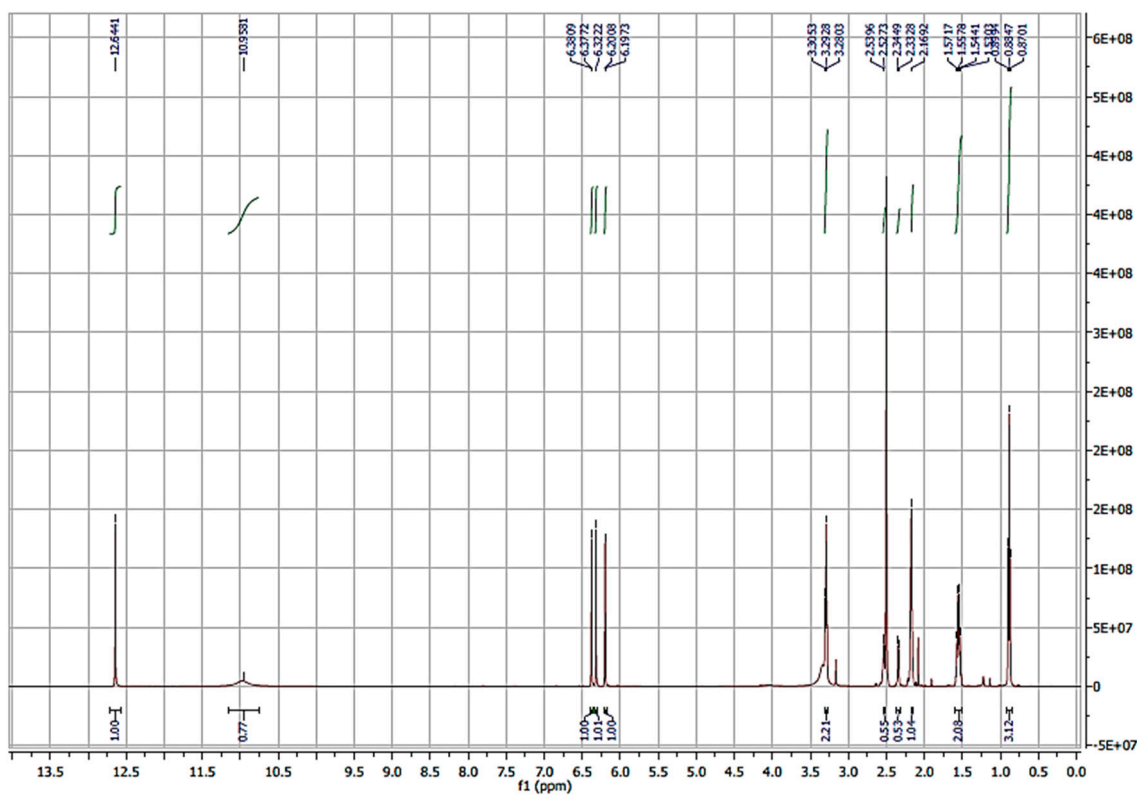

Figure S15.  $^1\text{H}$  NMR (500 MHz,  $\text{DMSO-}d_6$ ) spectrum of compound 18.

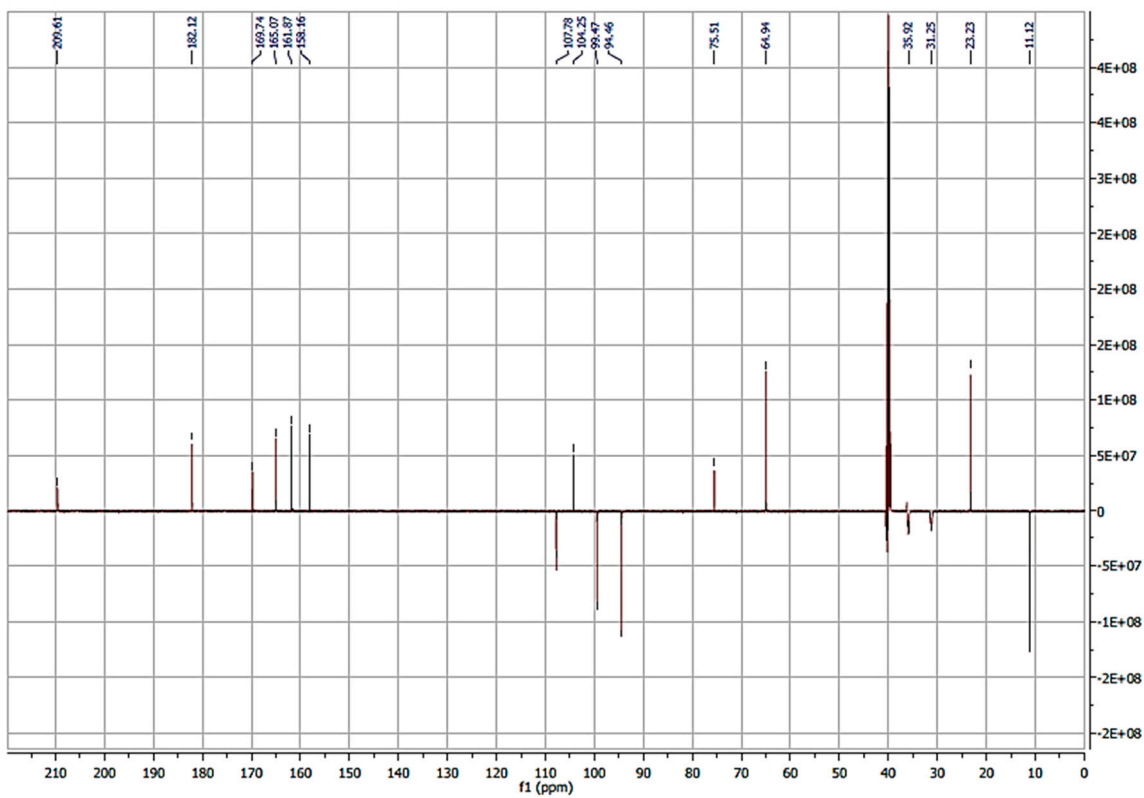

Figure S16. JMOD (125 MHz,  $\text{DMSO-}d_6$ ) spectrum of compound 18.

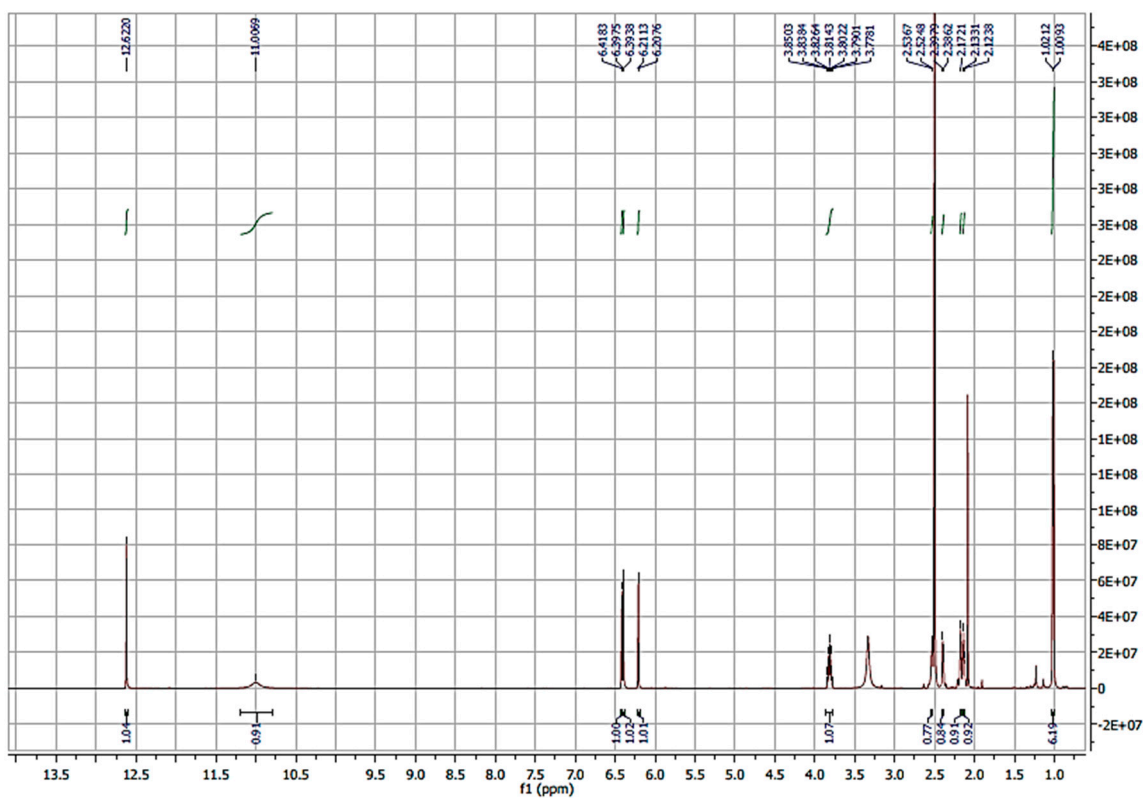

Figure S17.  $^1\text{H}$  NMR (500 MHz,  $\text{DMSO-}d_6$ ) spectrum of compound 19.

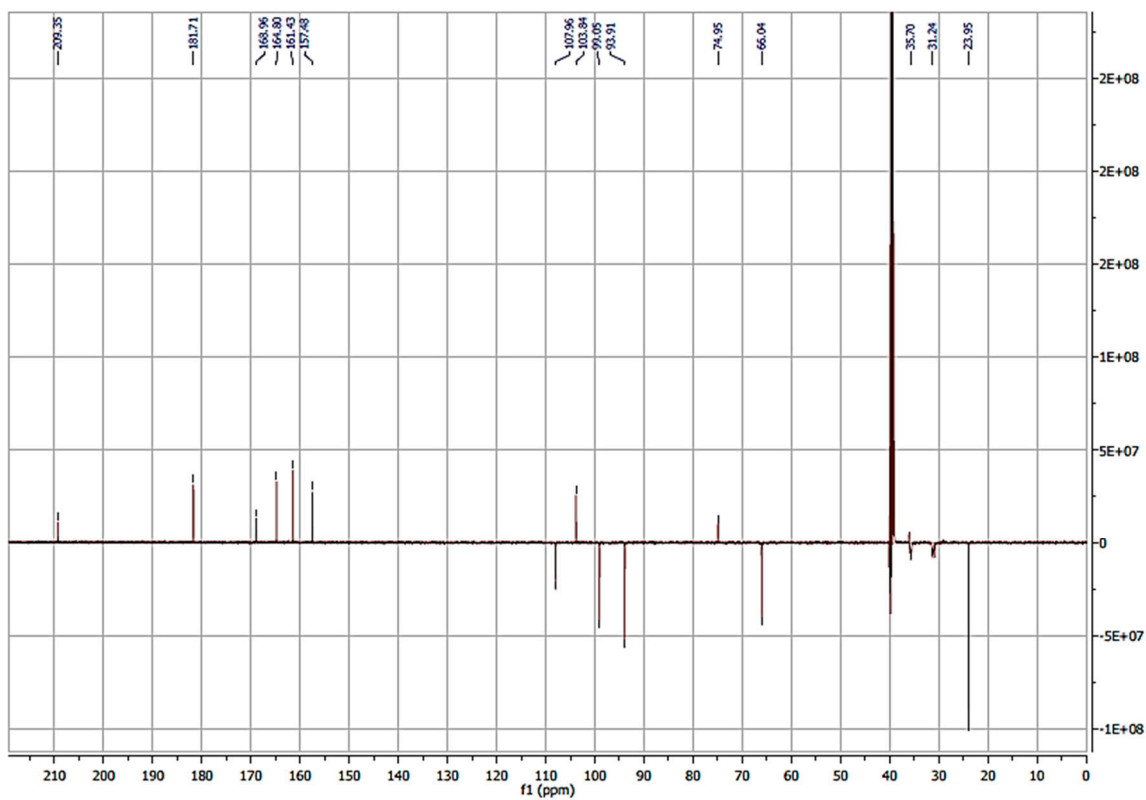

Figure S18. JMOD (125 MHz,  $\text{DMSO-}d_6$ ) spectrum of compound 19.

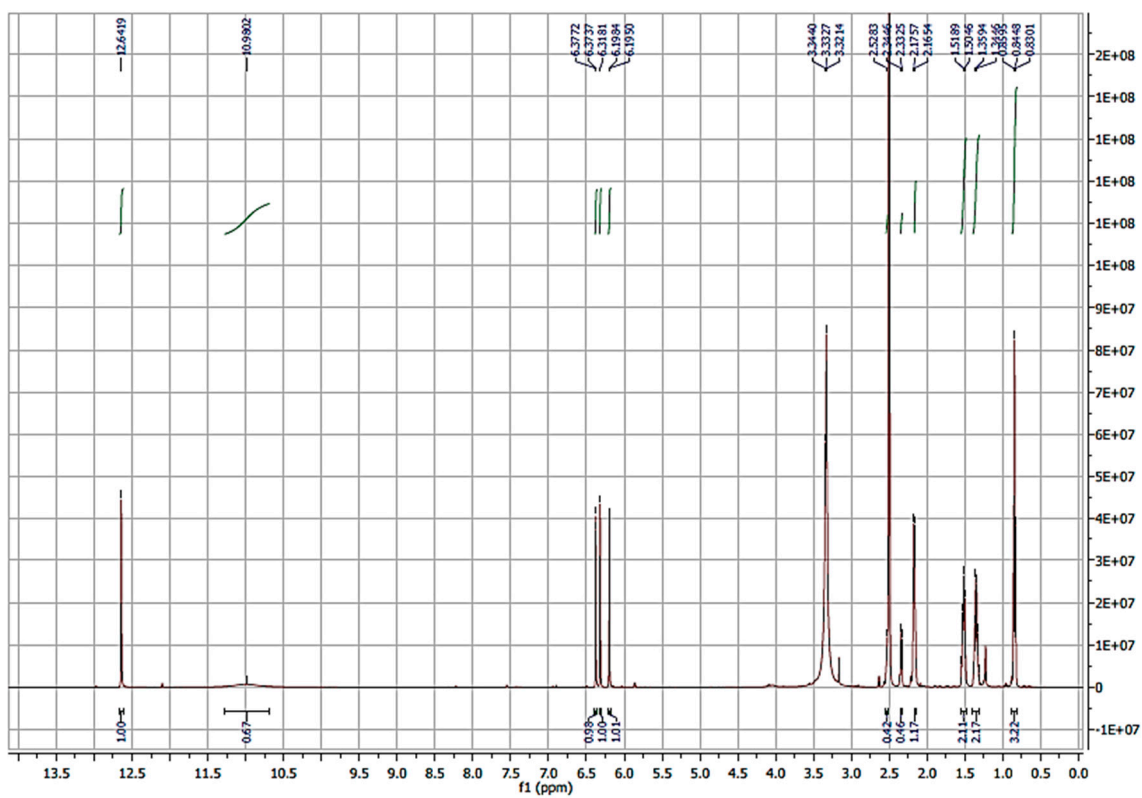

Figure S19.  $^1\text{H}$  NMR (500 MHz,  $\text{DMSO-}d_6$ ) spectrum of compound 20.

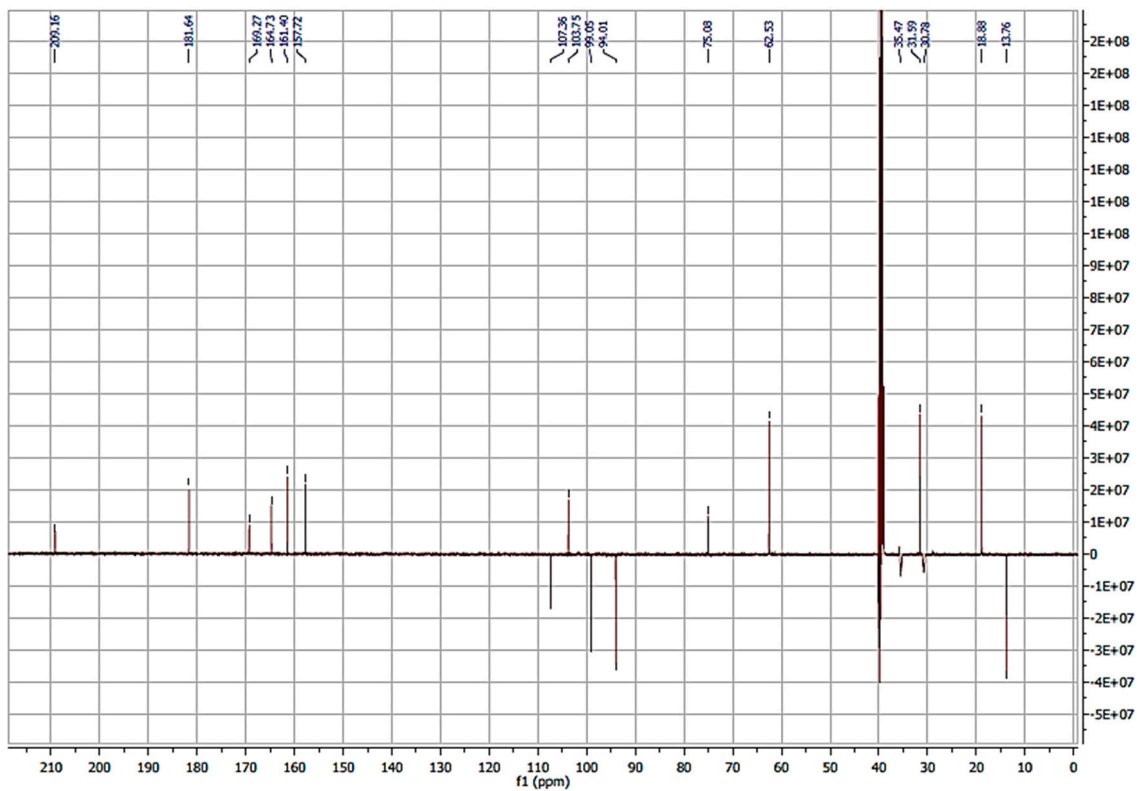

Figure S20. JMOD (125 MHz,  $\text{DMSO-}d_6$ ) spectrum of compound 20.

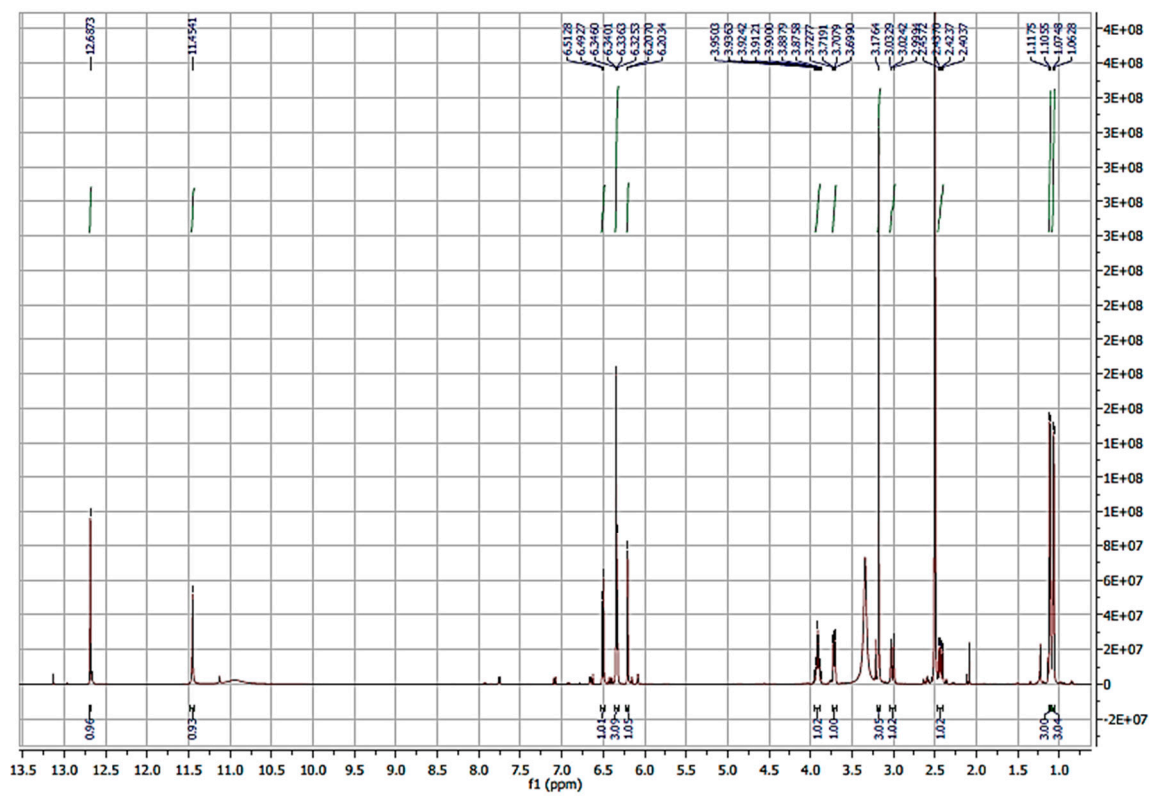

Figure S21.  $^1\text{H}$  NMR (500 MHz,  $\text{DMSO-}d_6$ ) spectrum of compound 21.

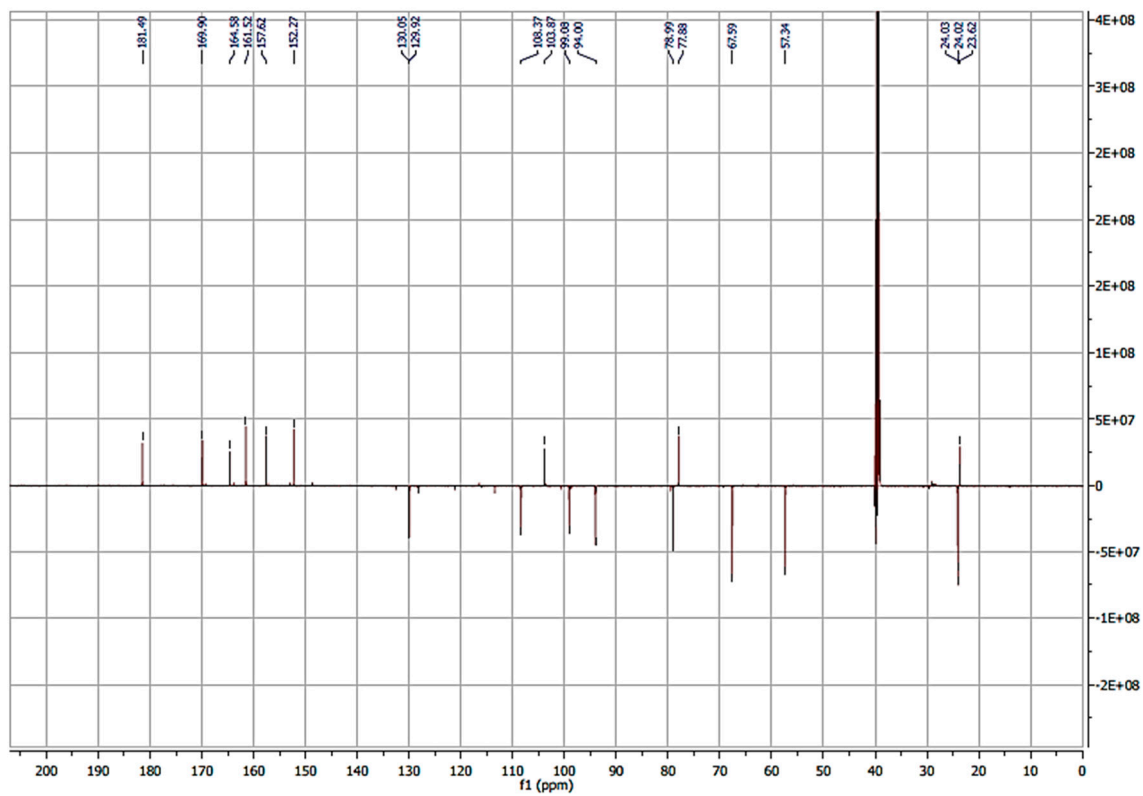

Figure S22. JMOD (125 MHz,  $\text{DMSO-}d_6$ ) spectrum of compound 21.

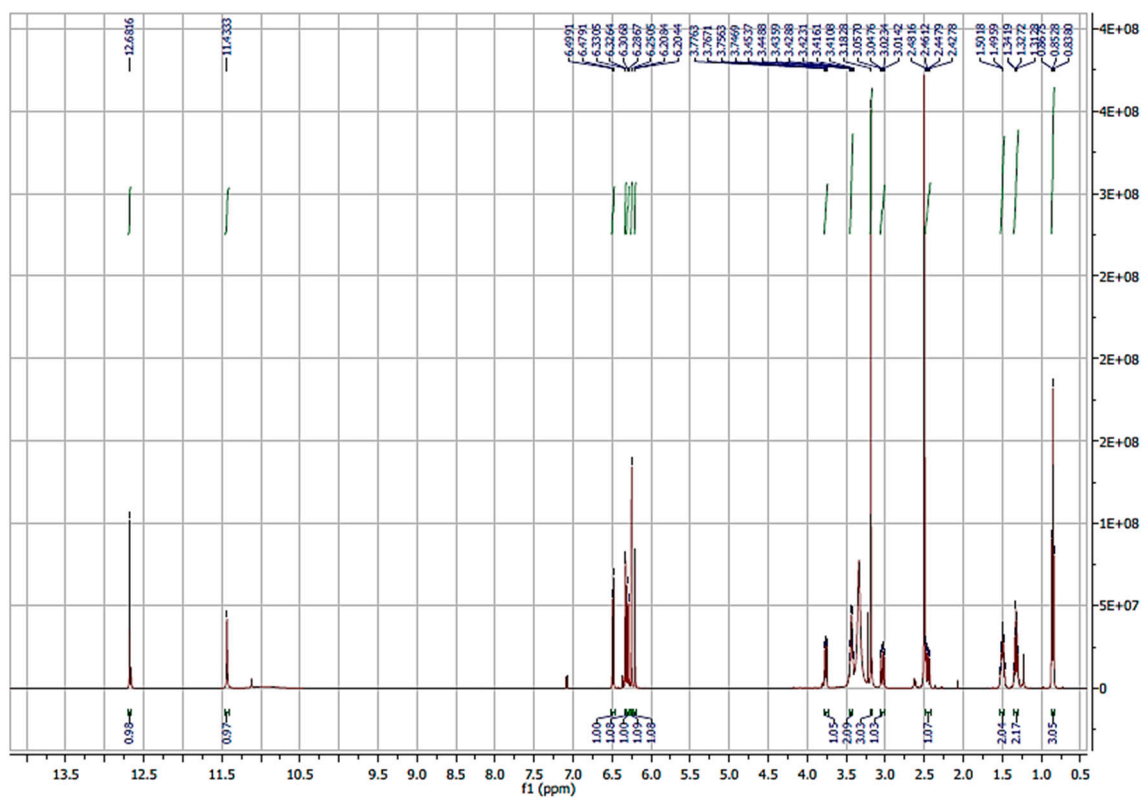

Figure S23.  $^1\text{H}$  NMR (500 MHz,  $\text{DMSO-}d_6$ ) spectrum of compound 22.

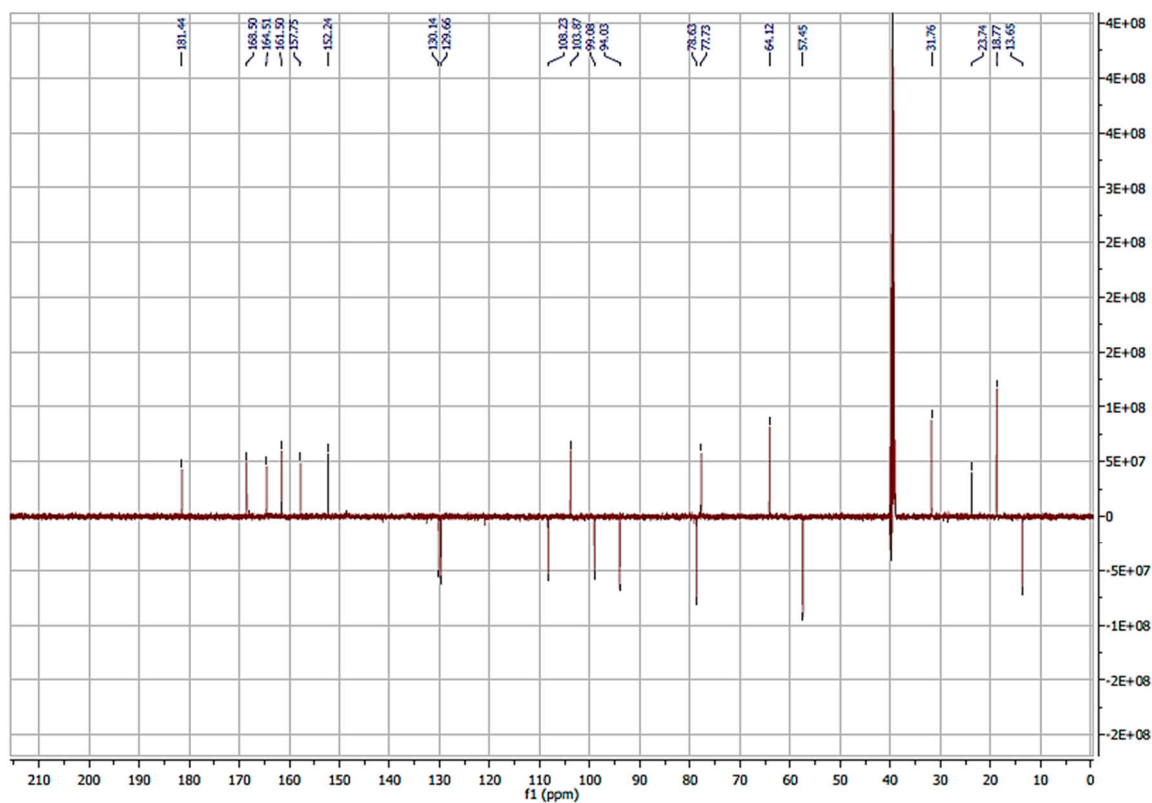

Figure S24. JMOD (125 MHz,  $\text{DMSO-}d_6$ ) spectrum of compound 22.

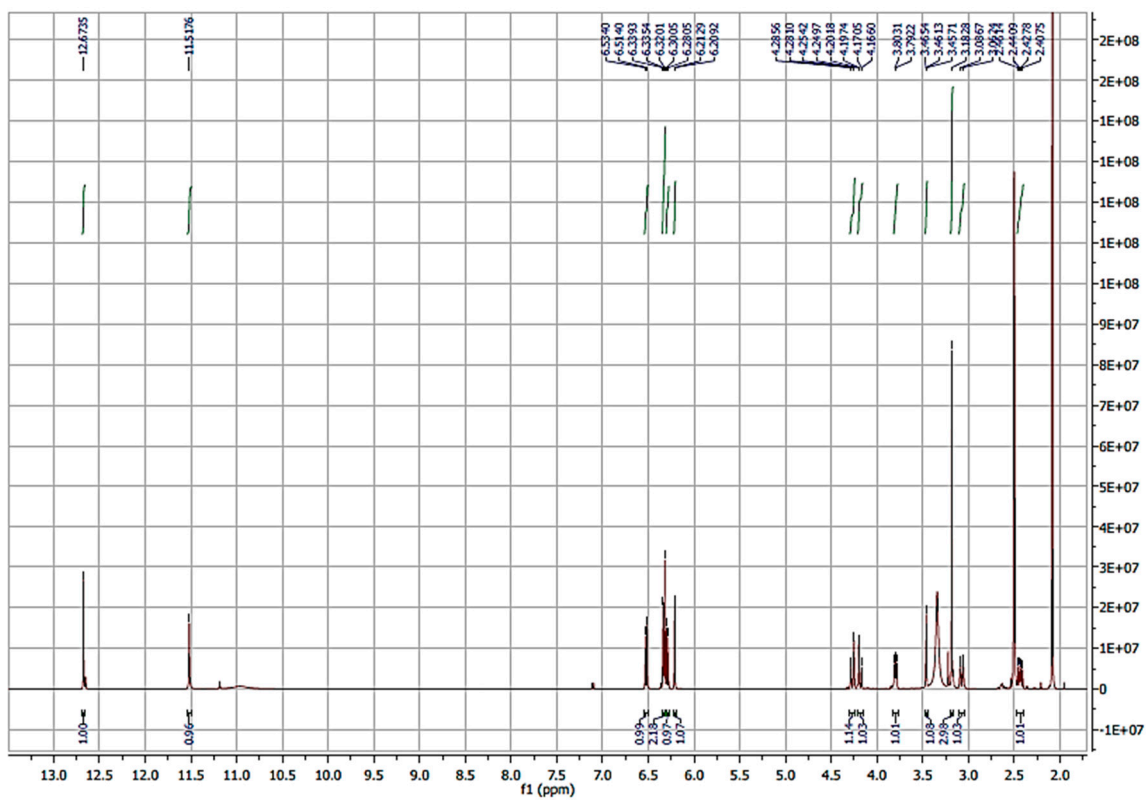

Figure S25.  $^1\text{H}$  NMR (500 MHz,  $\text{DMSO-}d_6$ ) spectrum of compound 23.

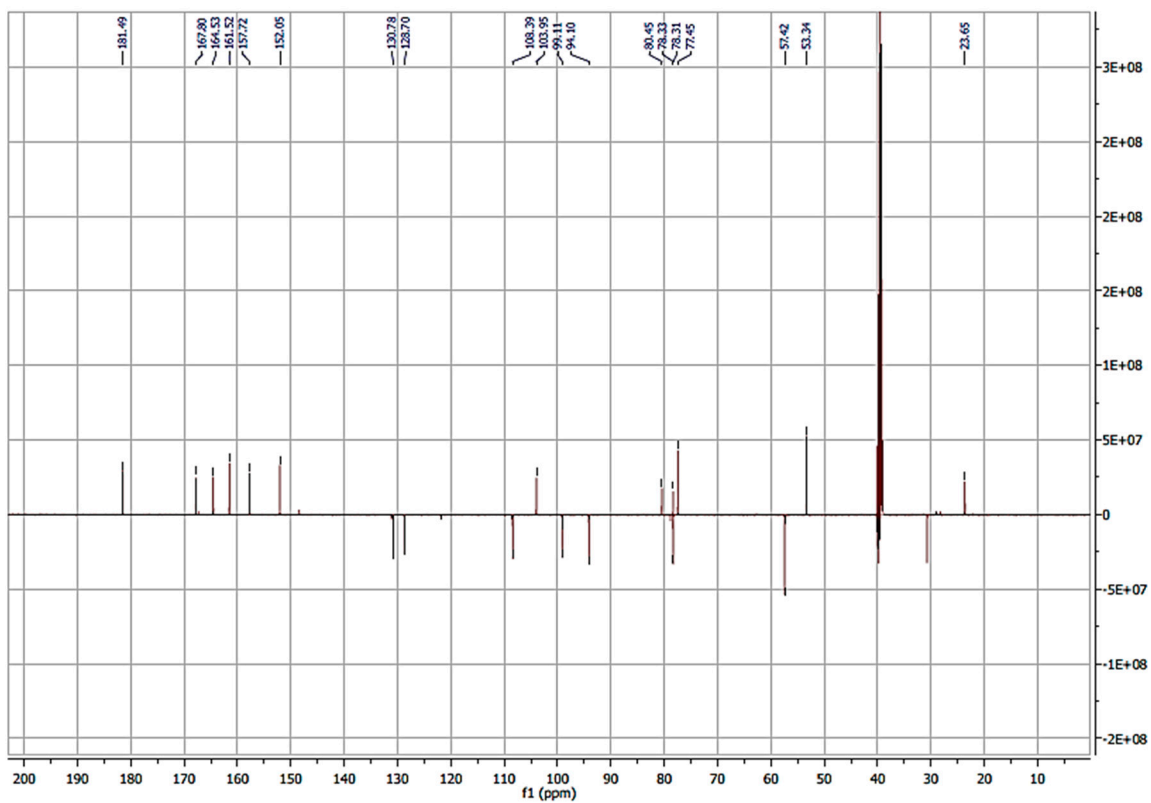

Figure S26. JMOD (125 MHz,  $\text{DMSO-}d_6$ ) spectrum of compound 23.

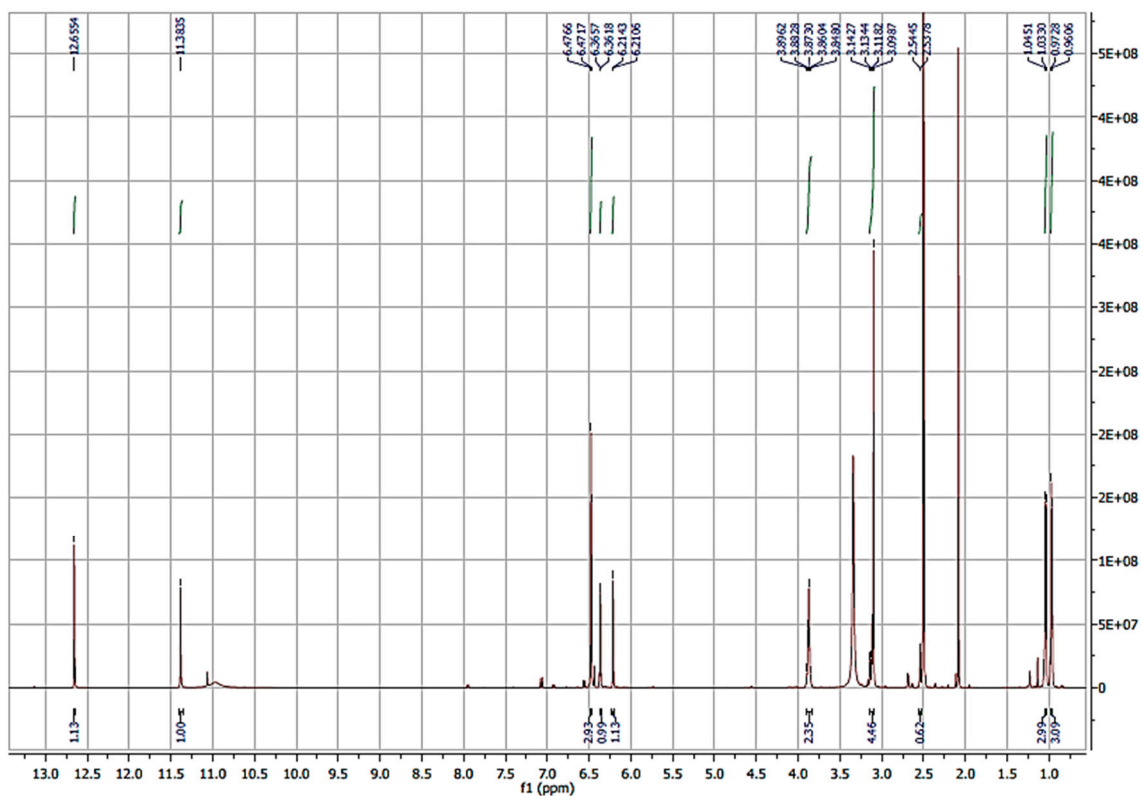

Figure S27.  $^1\text{H}$  NMR (500 MHz,  $\text{DMSO-}d_6$ ) spectrum of compound 24.

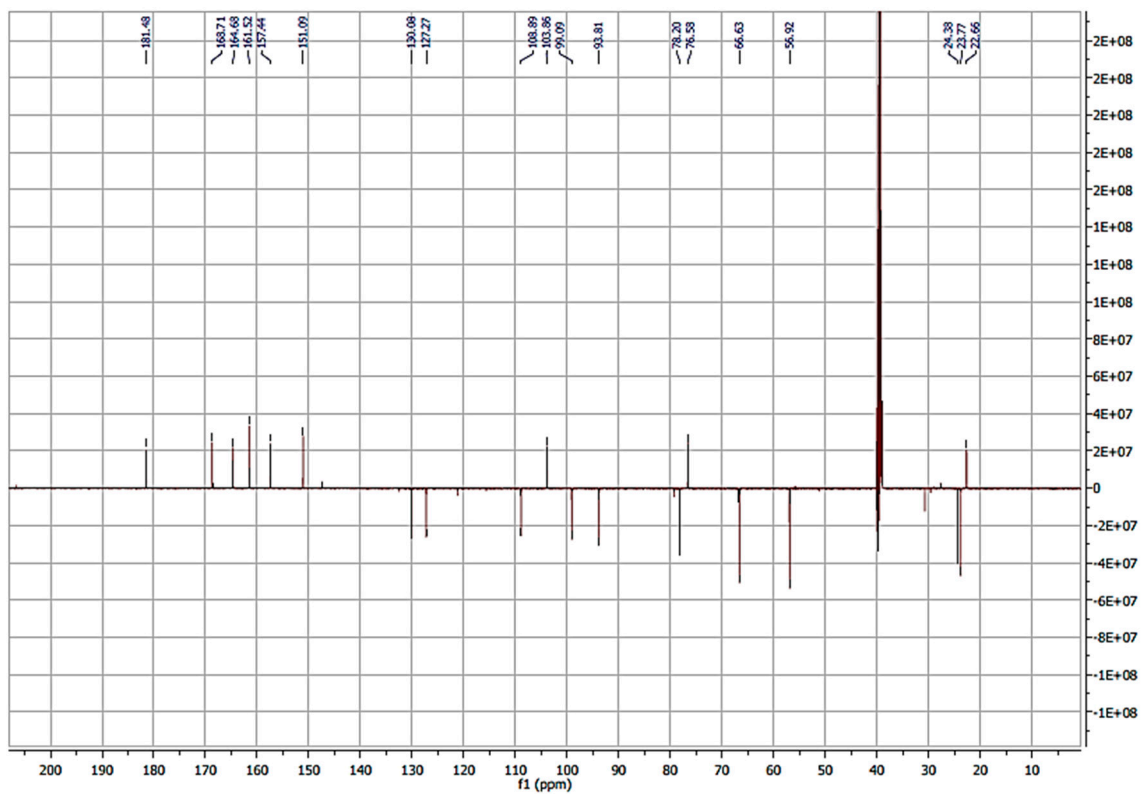

Figure S28. JMOD (125 MHz,  $\text{DMSO-}d_6$ ) spectrum of compound 24.

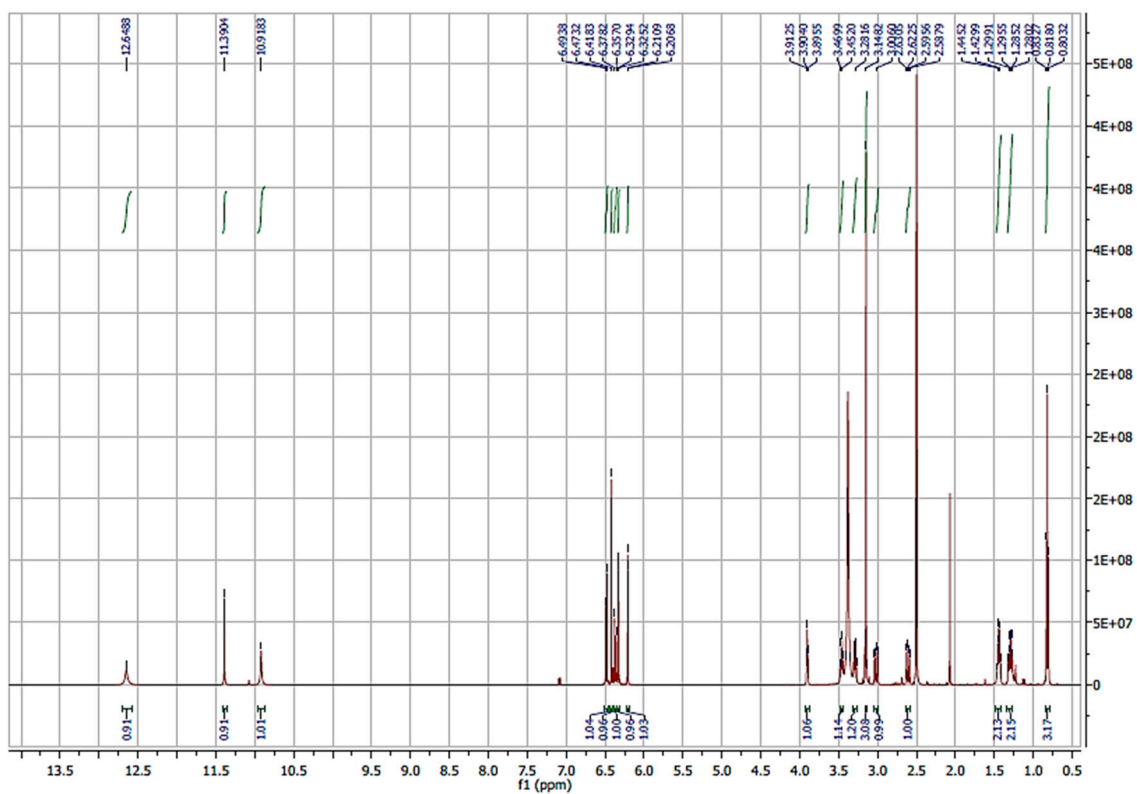

Figure S29.  $^1\text{H}$  NMR (500 MHz,  $\text{DMSO-}d_6$ ) spectrum of compound 25.

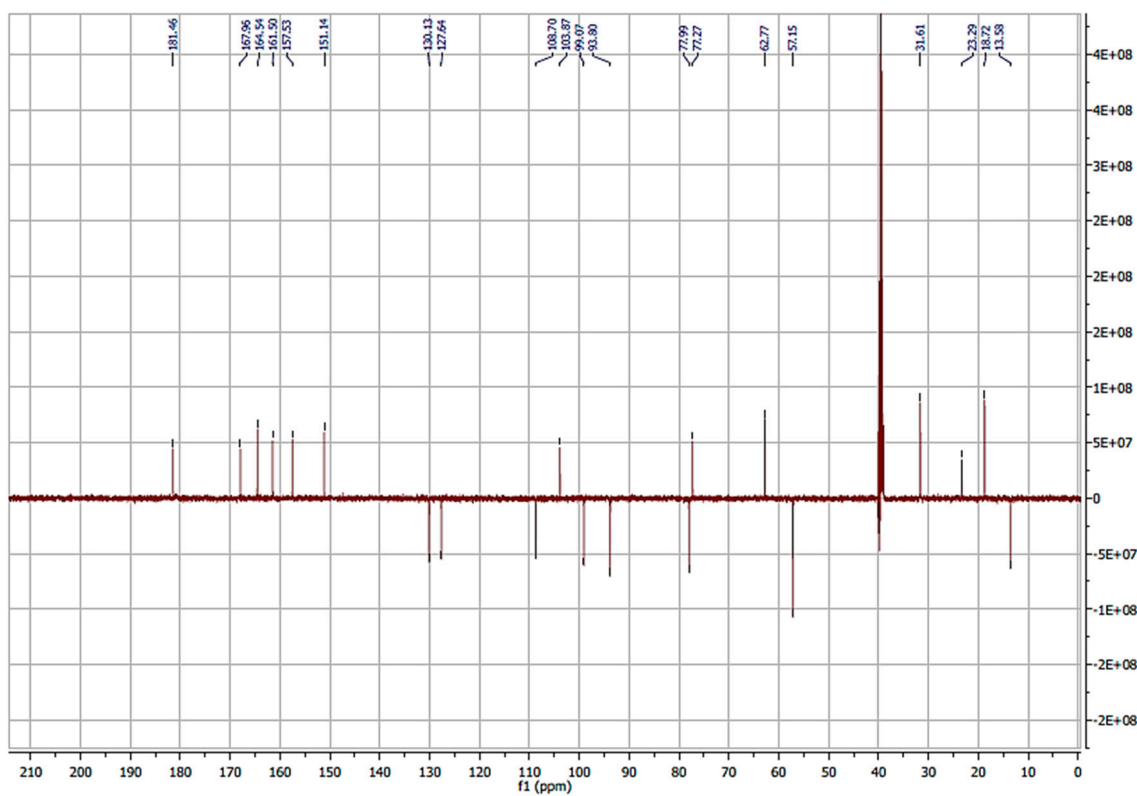

Figure S30. JMOD (125 MHz,  $\text{DMSO-}d_6$ ) spectrum of compound 25.



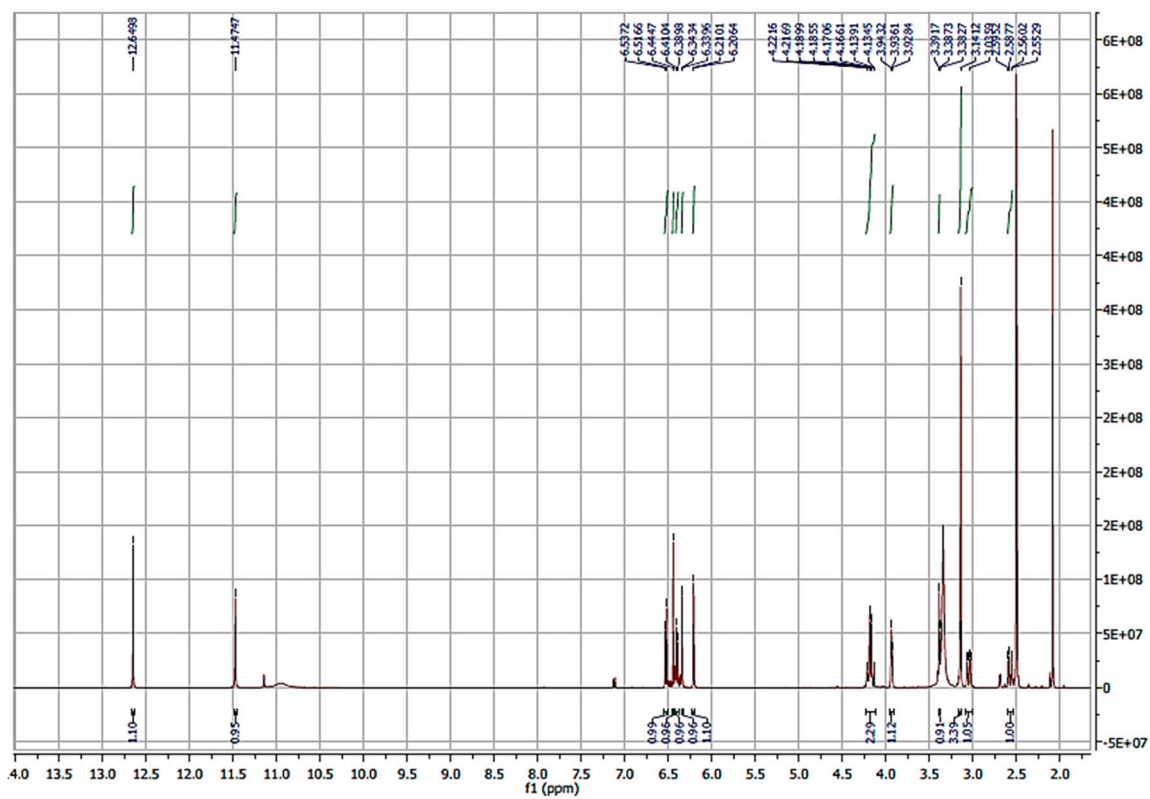

Figure S31.  $^1\text{H}$  NMR (500 MHz,  $\text{DMSO-}d_6$ ) spectrum of compound 26.

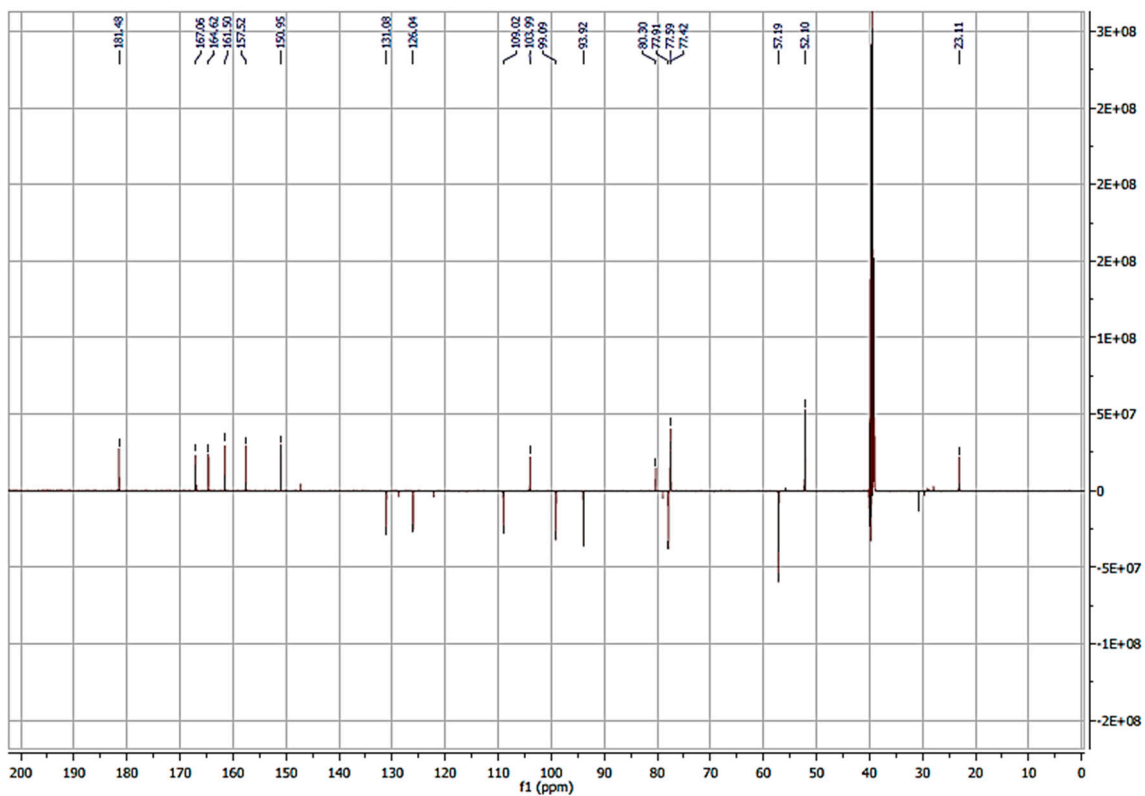

Figure S32. JMOD (125 MHz,  $\text{DMSO-}d_6$ ) spectrum of compound 26.

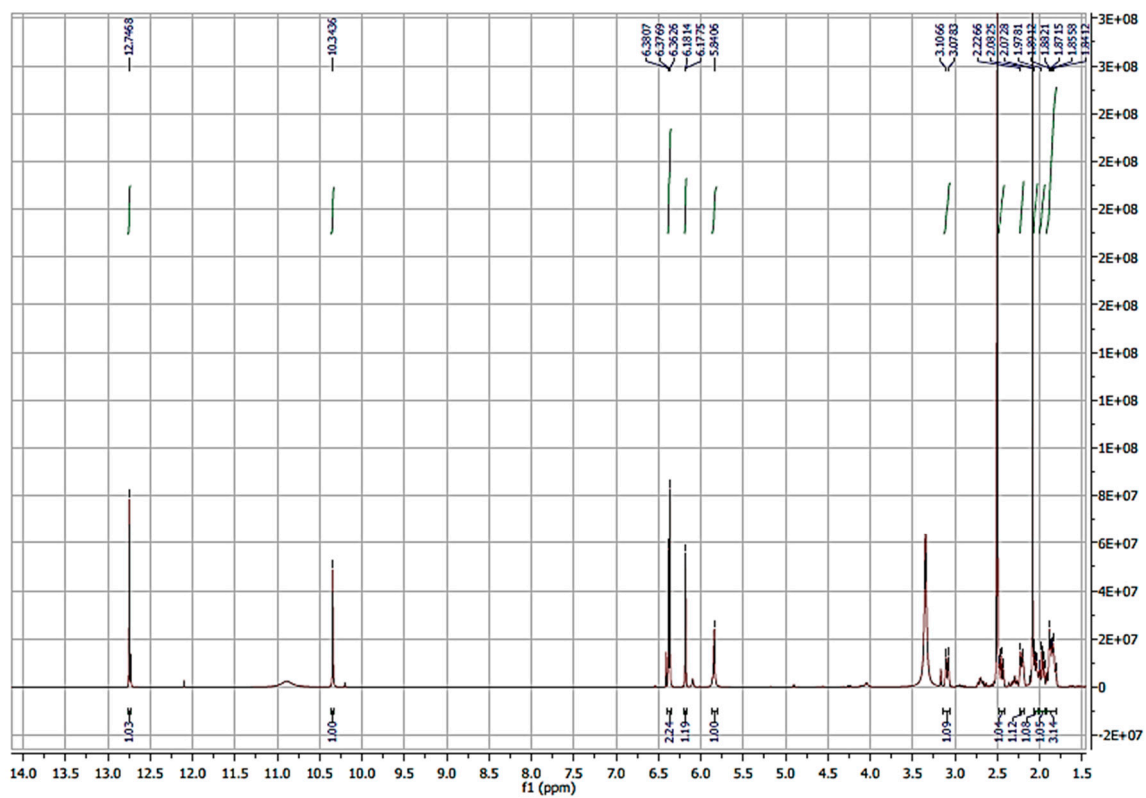

Figure S33.  $^1\text{H}$  NMR (500 MHz,  $\text{DMSO-}d_6$ ) spectrum of compound 27.

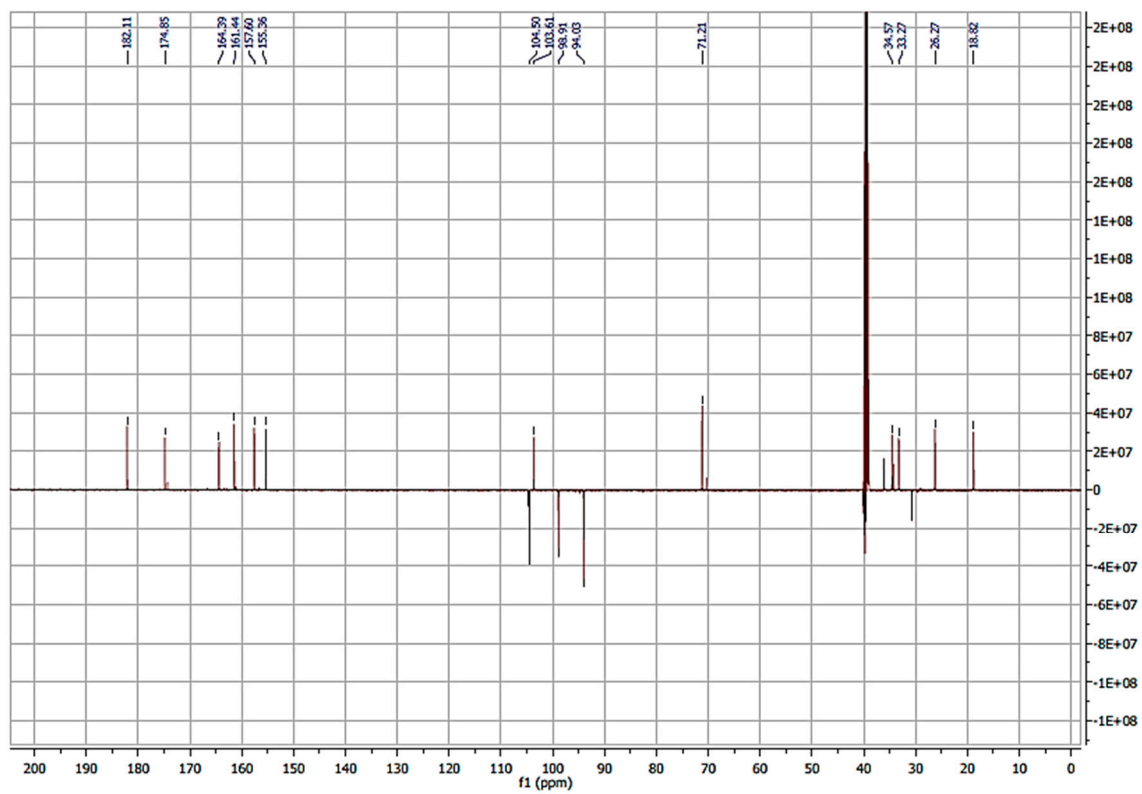

Figure S34. JMOD (125 MHz,  $\text{DMSO-}d_6$ ) spectrum of compound 27.

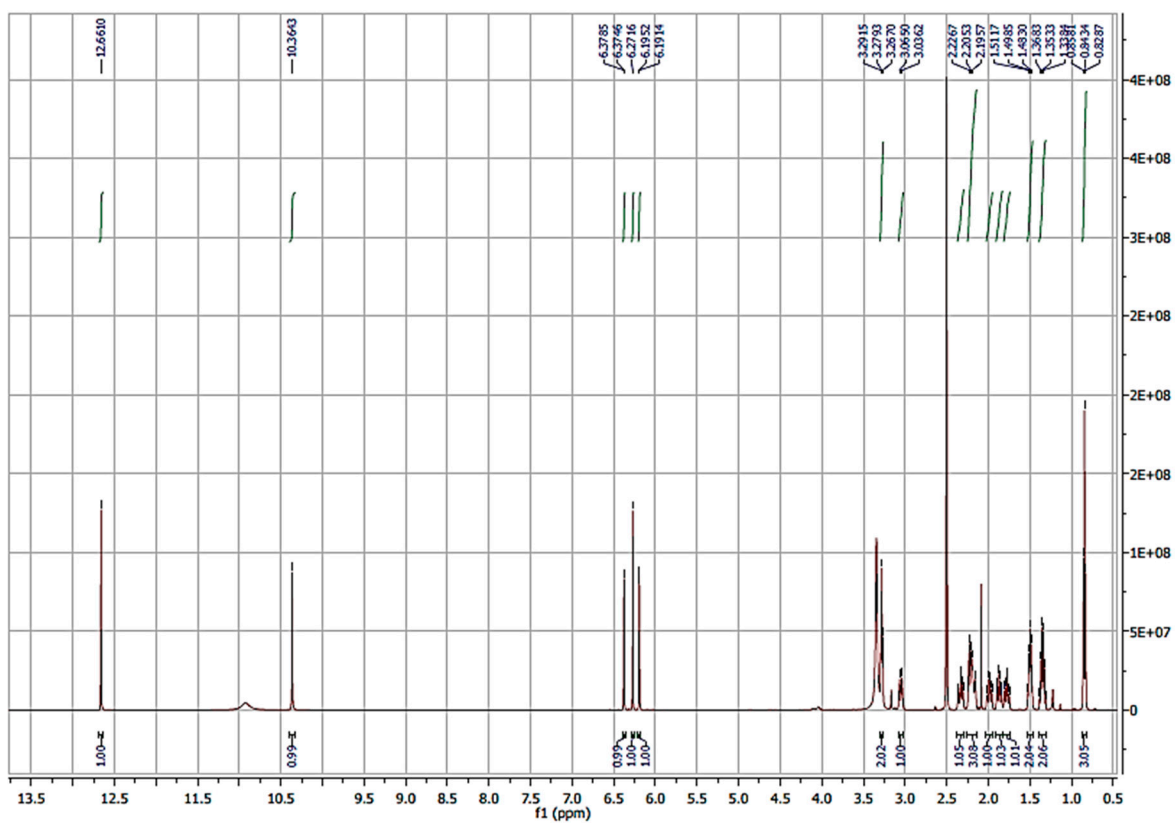

Figure S35.  $^1\text{H}$  NMR (500 MHz,  $\text{DMSO-}d_6$ ) spectrum of compound 28.

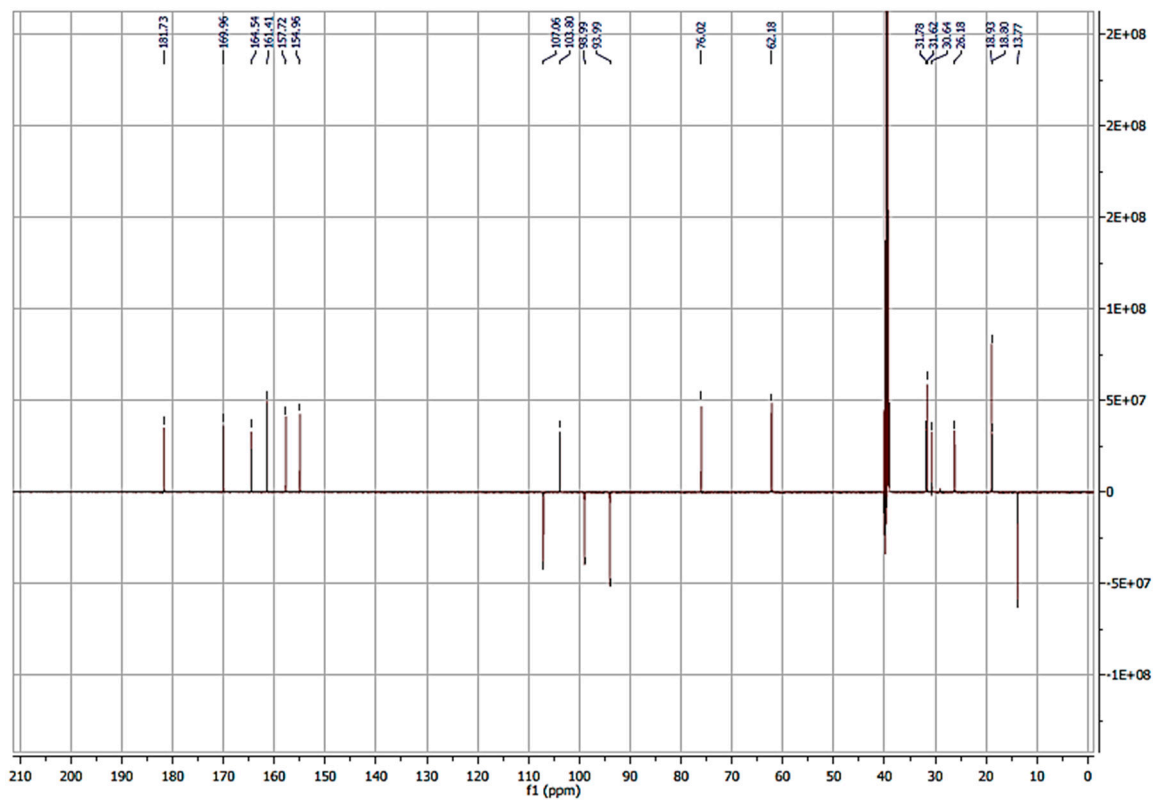

Figure S36. JMOD (125 MHz,  $\text{DMSO-}d_6$ ) spectrum of compound 28.

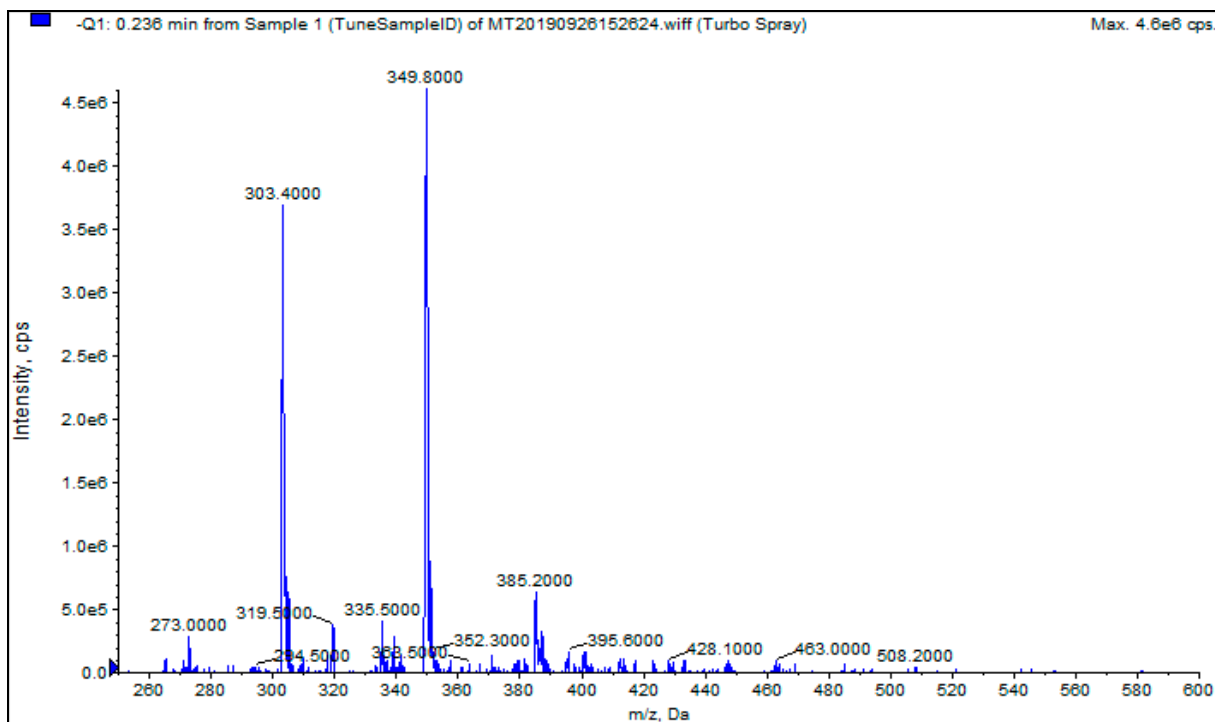

**Figure S37.** Mass spectrum of compound **10** recorded in negative ionization mode.  
(solvent: CH<sub>3</sub>CN + 1% HCOOH)

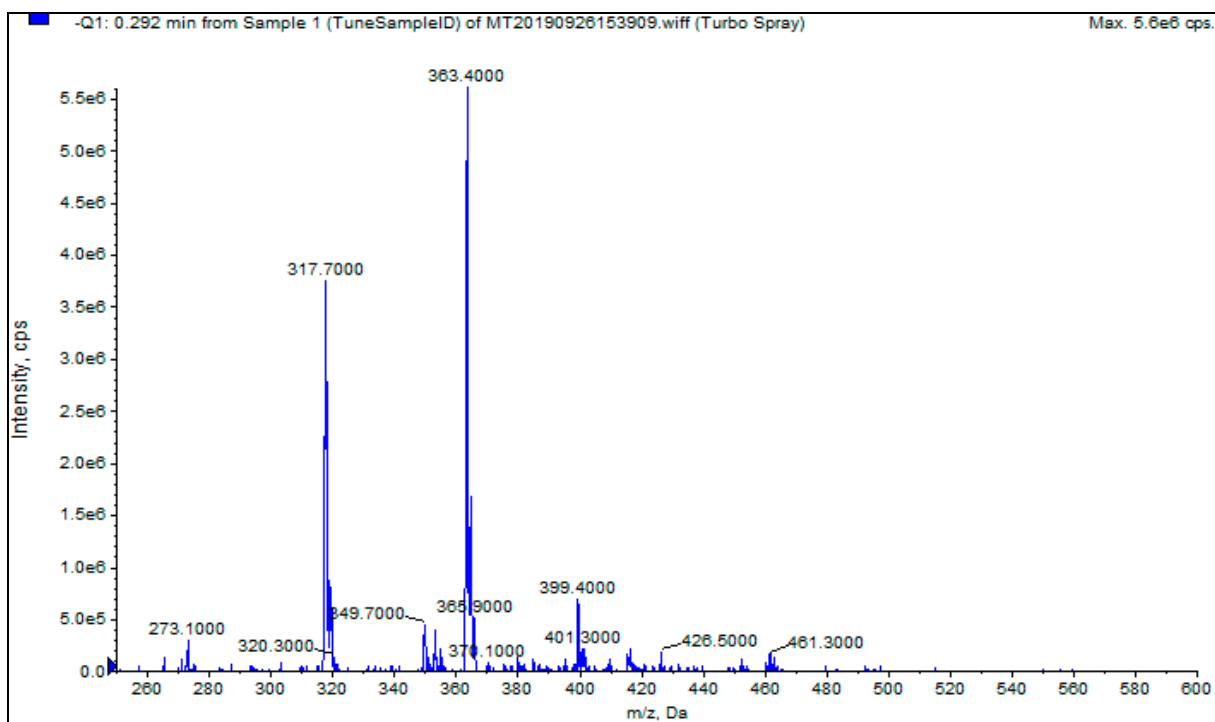

**Figure S38.** Mass spectrum of compound **11** recorded in negative ionization mode.  
(solvent: CH<sub>3</sub>CN + 1% HCOOH)

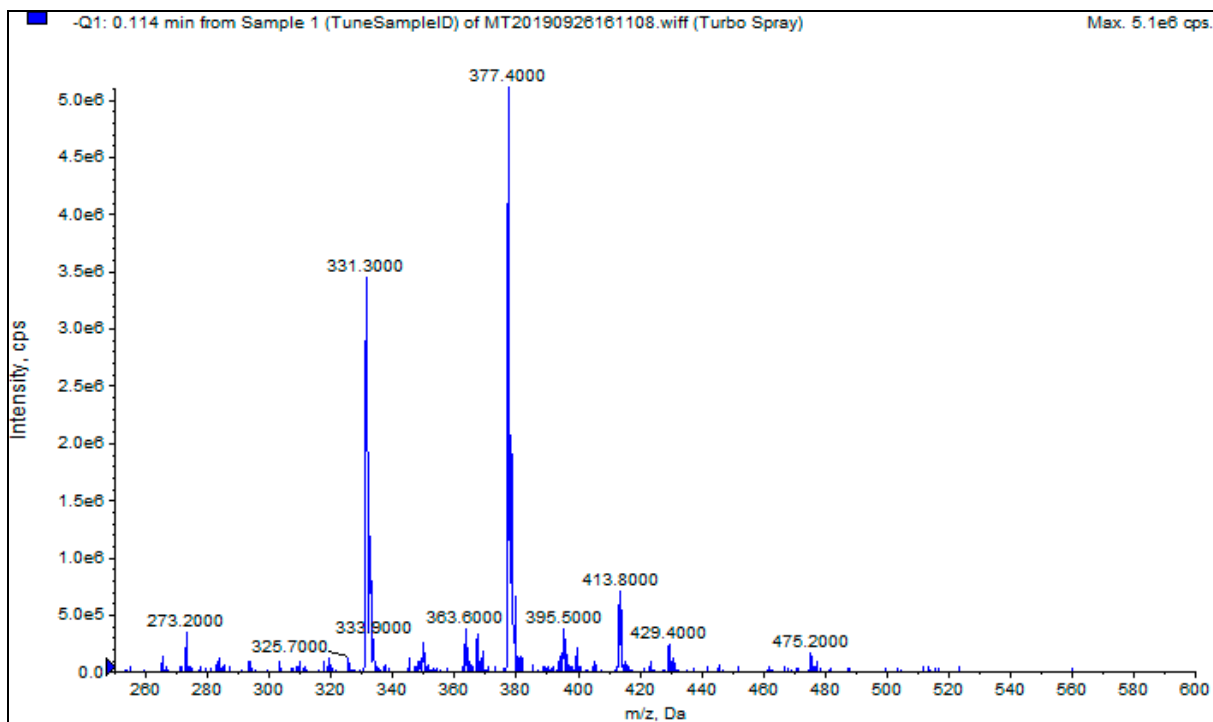

**Figure S39.** Mass spectrum of compound **12** recorded in negative ionization mode.  
(solvent: CH<sub>3</sub>CN + 1% HCOOH)

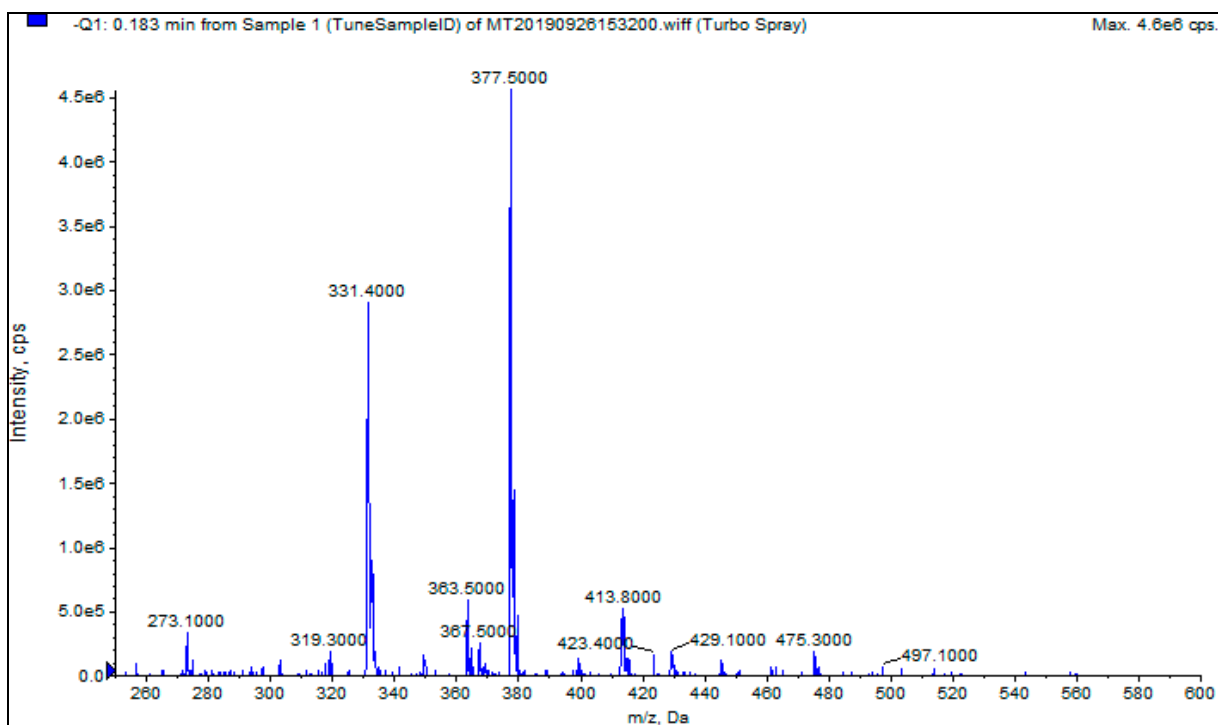

**Figure S40.** Mass spectrum of compound **13** recorded in negative ionization mode.  
(solvent: CH<sub>3</sub>CN + 1% HCOOH)

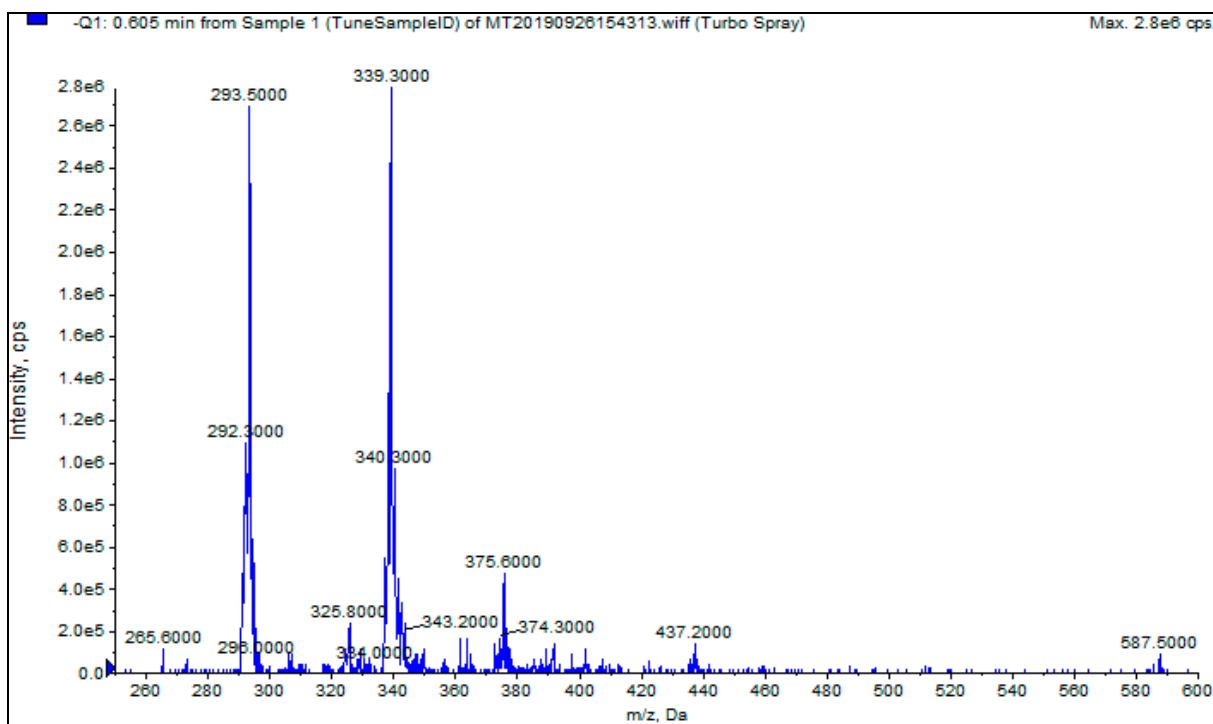

**Figure S41.** Mass spectrum of compound **15** recorded in negative ionization mode.  
(solvent: CH<sub>3</sub>CN + 1% HCOOH)

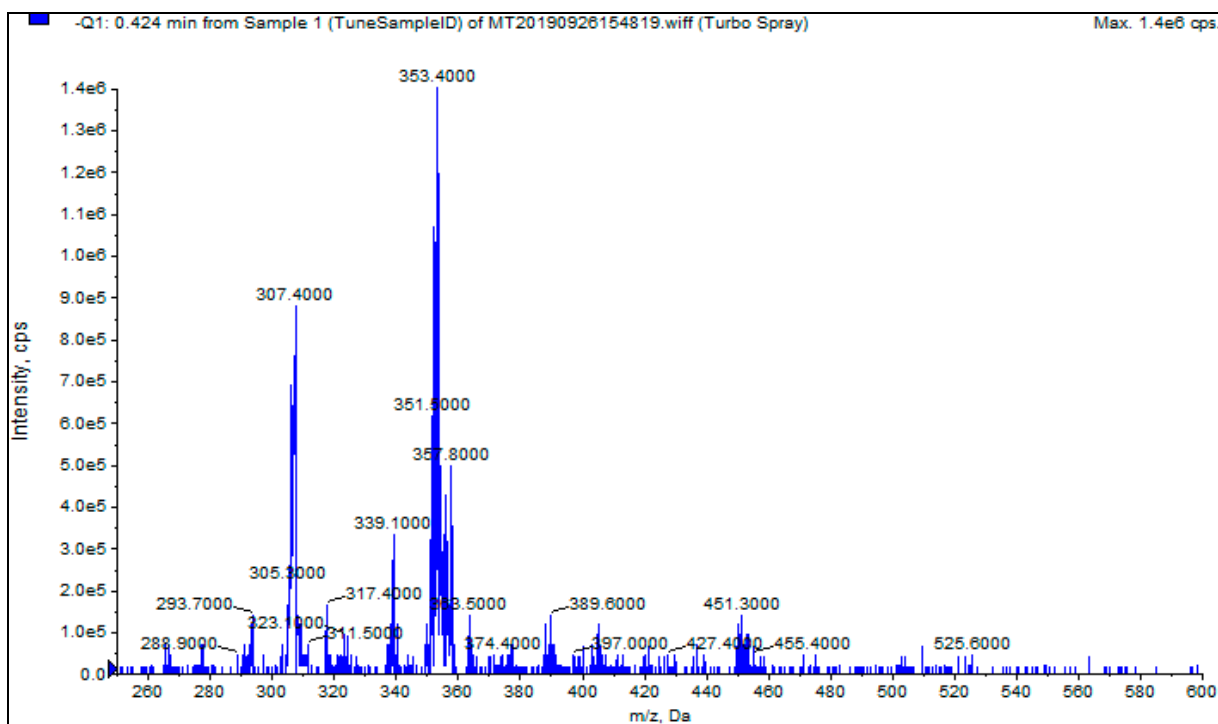

**Figure S42.** Mass spectrum of compound **16** recorded in negative ionization mode.  
(solvent: CH<sub>3</sub>CN + 1% HCOOH)

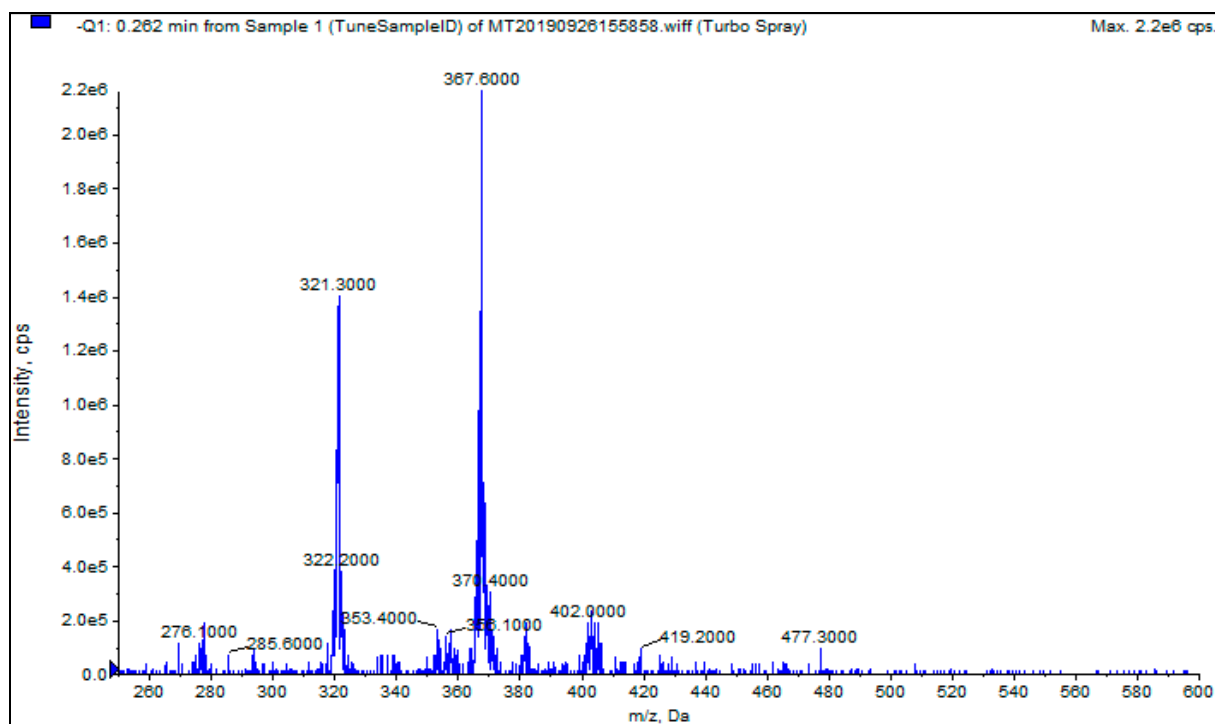

**Figure S43.** Mass spectrum of compound **17** recorded in negative ionization mode.  
(solvent: CH<sub>3</sub>CN + 1% HCOOH)

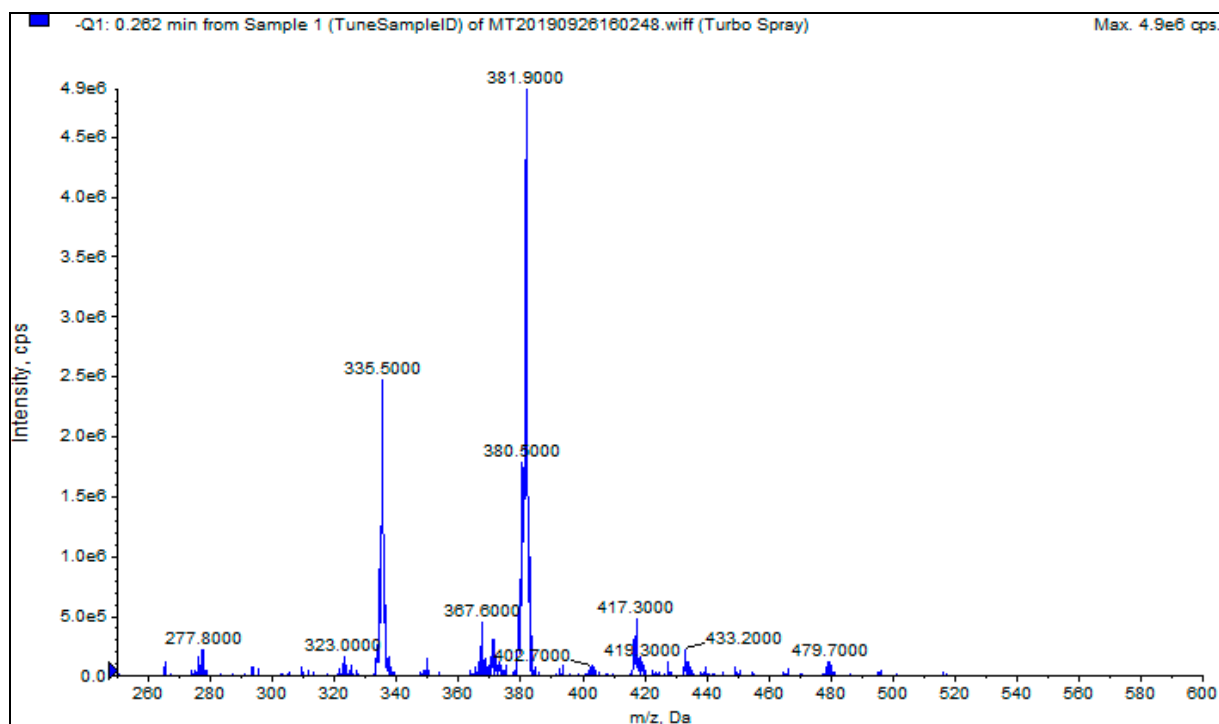

**Figure S44.** Mass spectrum of compound **18** recorded in negative ionization mode.  
(solvent: CH<sub>3</sub>CN + 1% HCOOH)

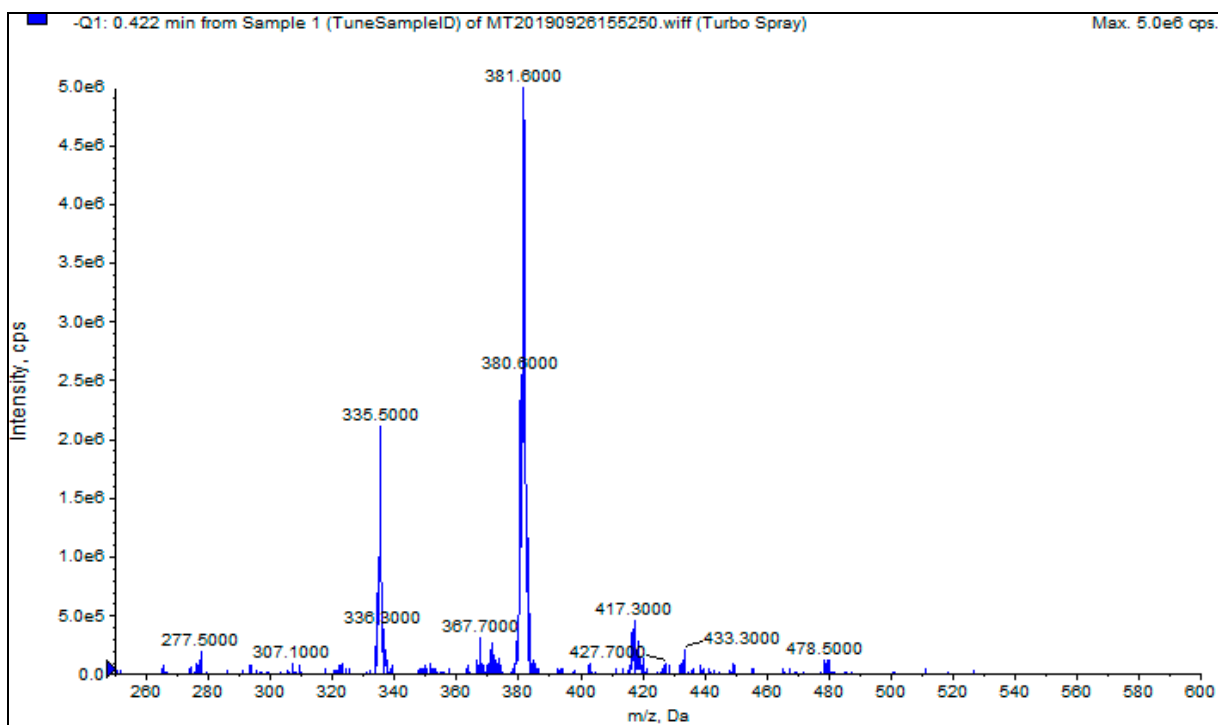

**Figure S45.** Mass spectrum of compound 19 recorded in negative ionization mode.  
(solvent: CH<sub>3</sub>CN + 1% HCOOH)

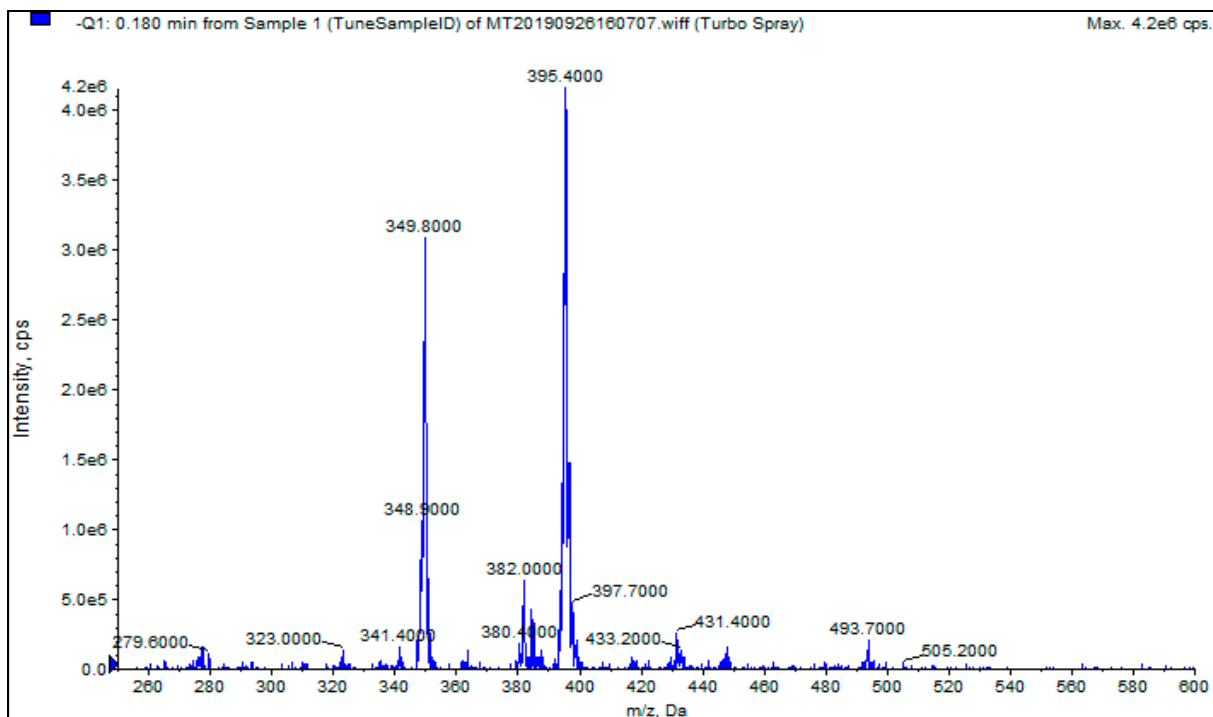

**Figure S46.** Mass spectrum of compound 20 recorded in negative ionization mode.  
(solvent: CH<sub>3</sub>CN + 1% HCOOH)



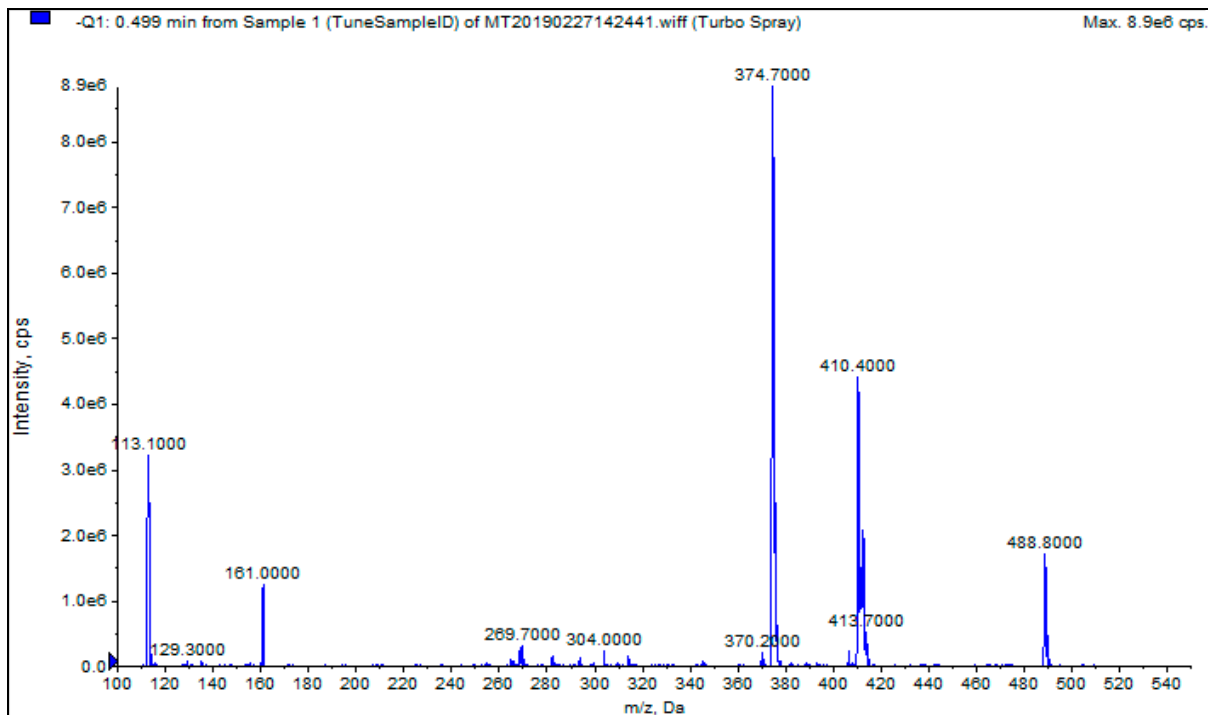

**Figure S47.** Mass spectrum of racemate **21** recorded in negative ionization mode.  
(solvent: CH<sub>3</sub>CN)

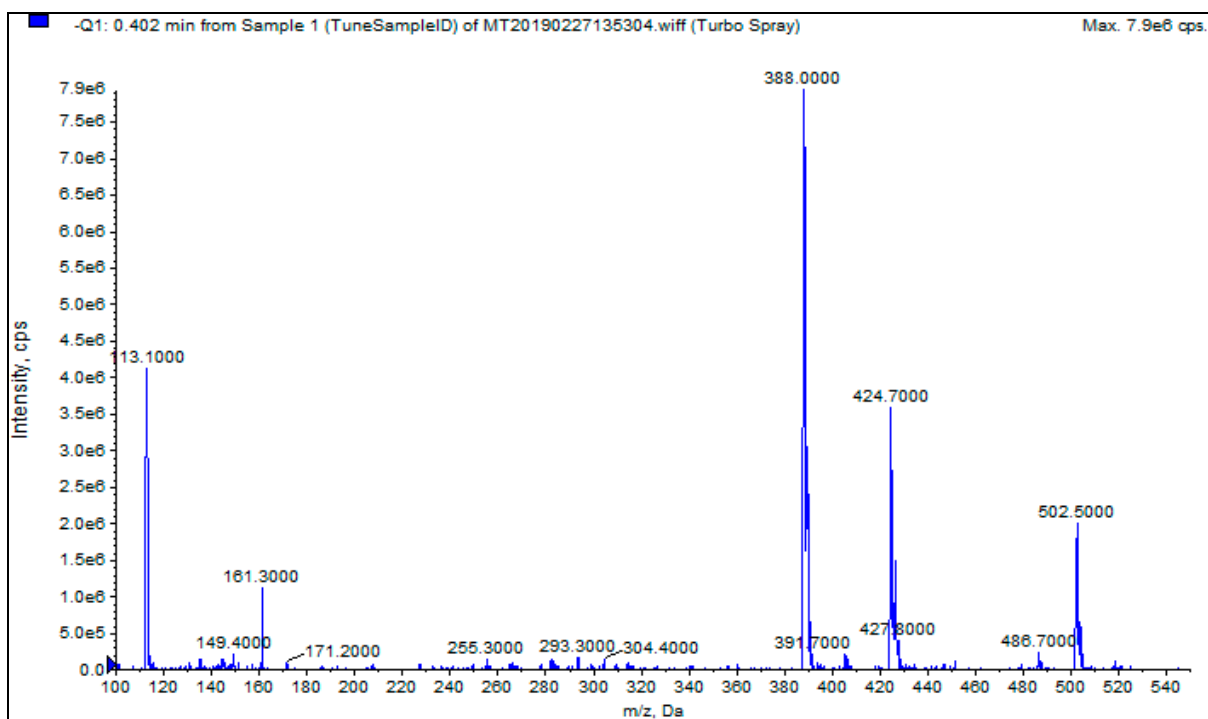

**Figure S48.** Mass spectrum of racemate **22** recorded in negative ionization mode.  
(solvent: CH<sub>3</sub>CN)

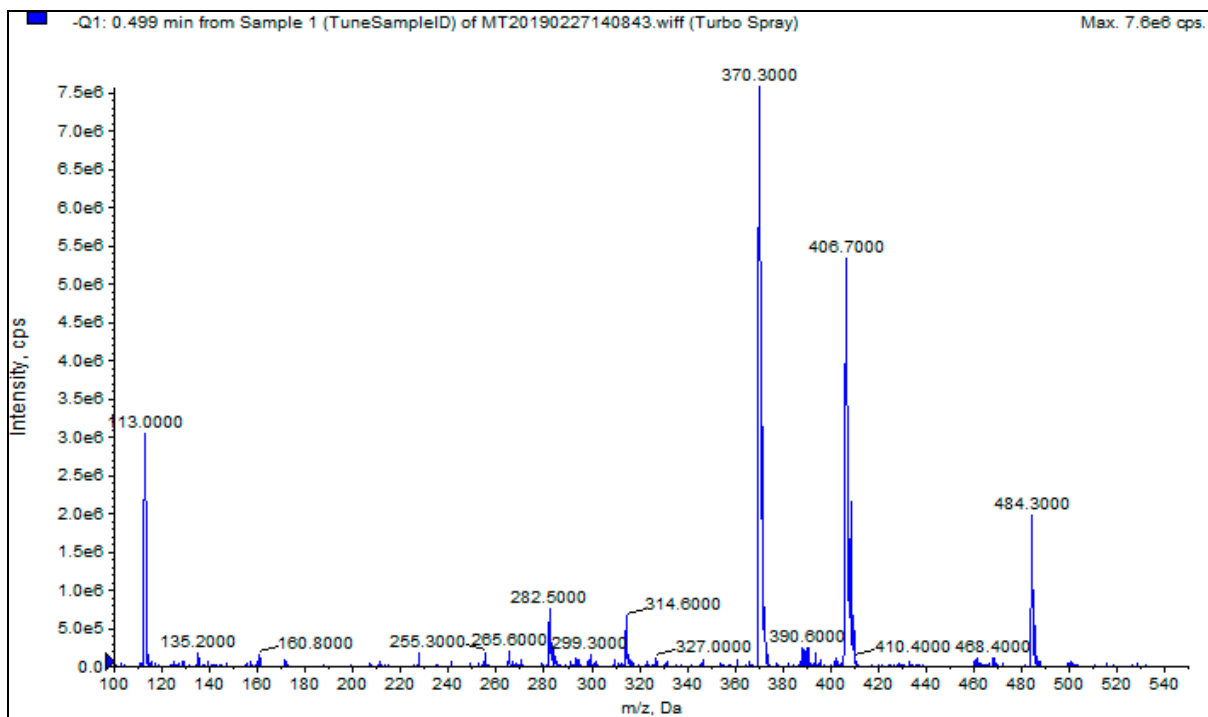

**Figure S49.** Mass spectrum of racemate **23** recorded in negative ionization mode.  
(solvent: CH<sub>3</sub>CN)

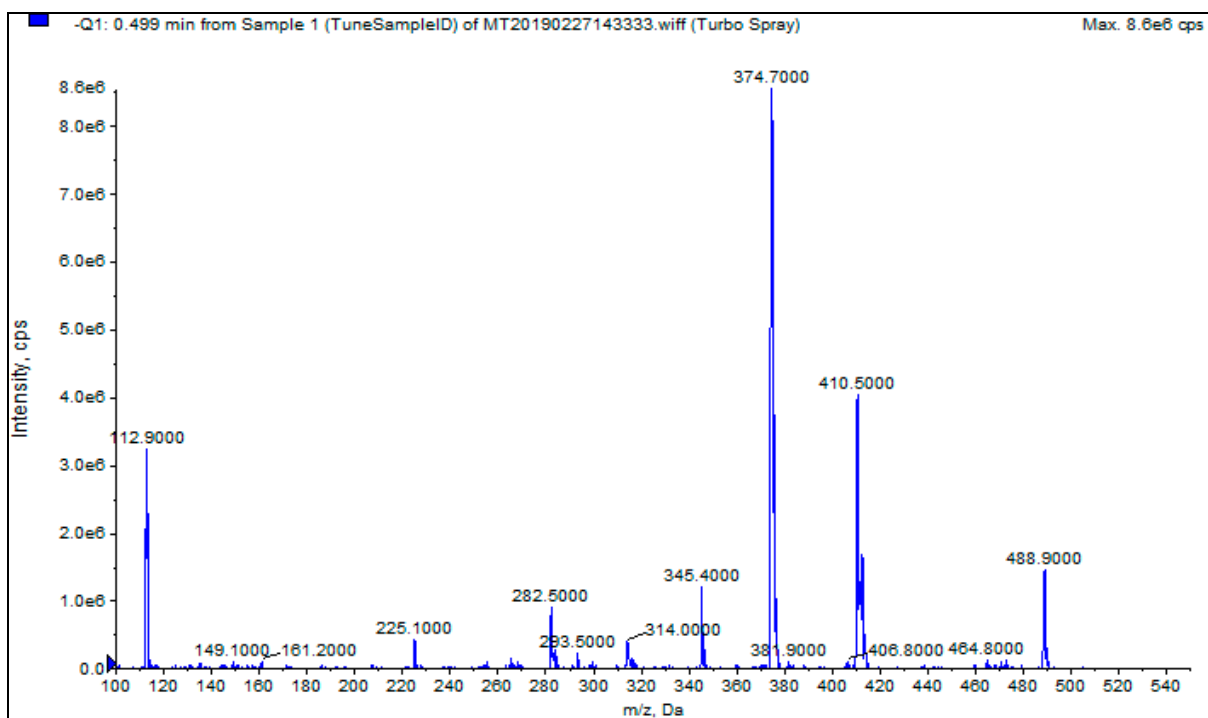

**Figure S50.** Mass spectrum of racemate **24** recorded in negative ionization mode.  
(solvent: CH<sub>3</sub>CN)

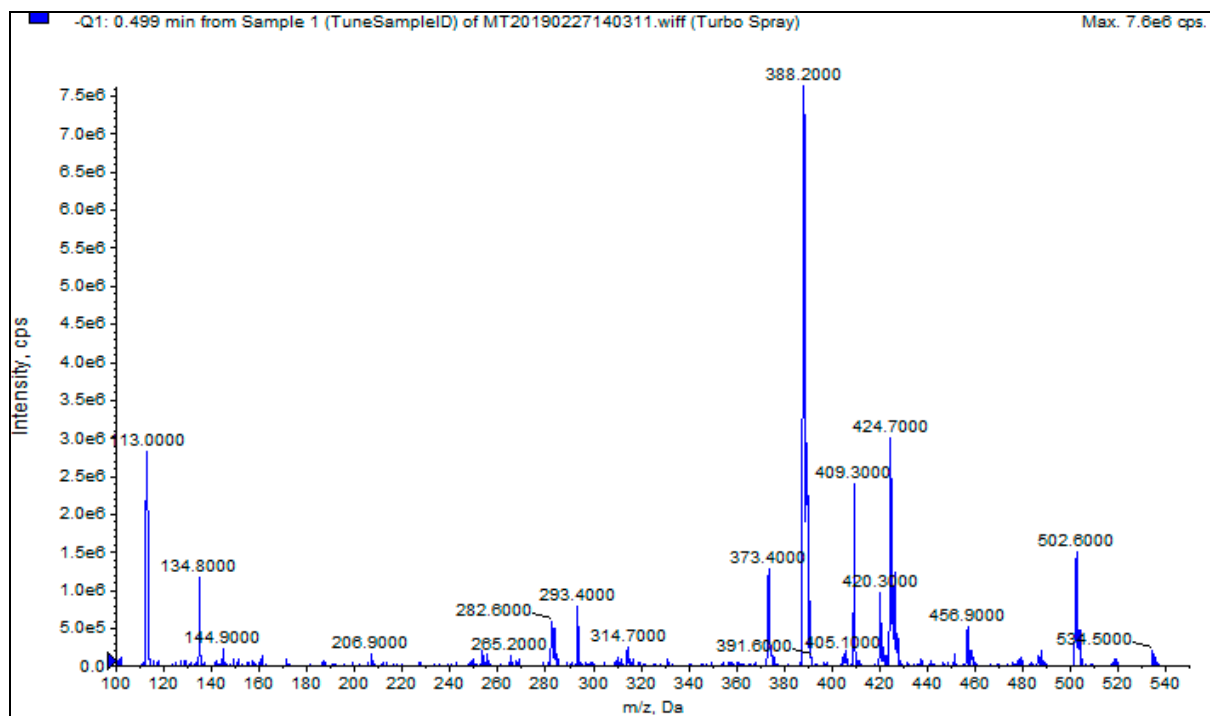

**Figure S51.** Mass spectrum of racemate **25** recorded in negative ionization mode.  
(solvent: CH<sub>3</sub>CN)

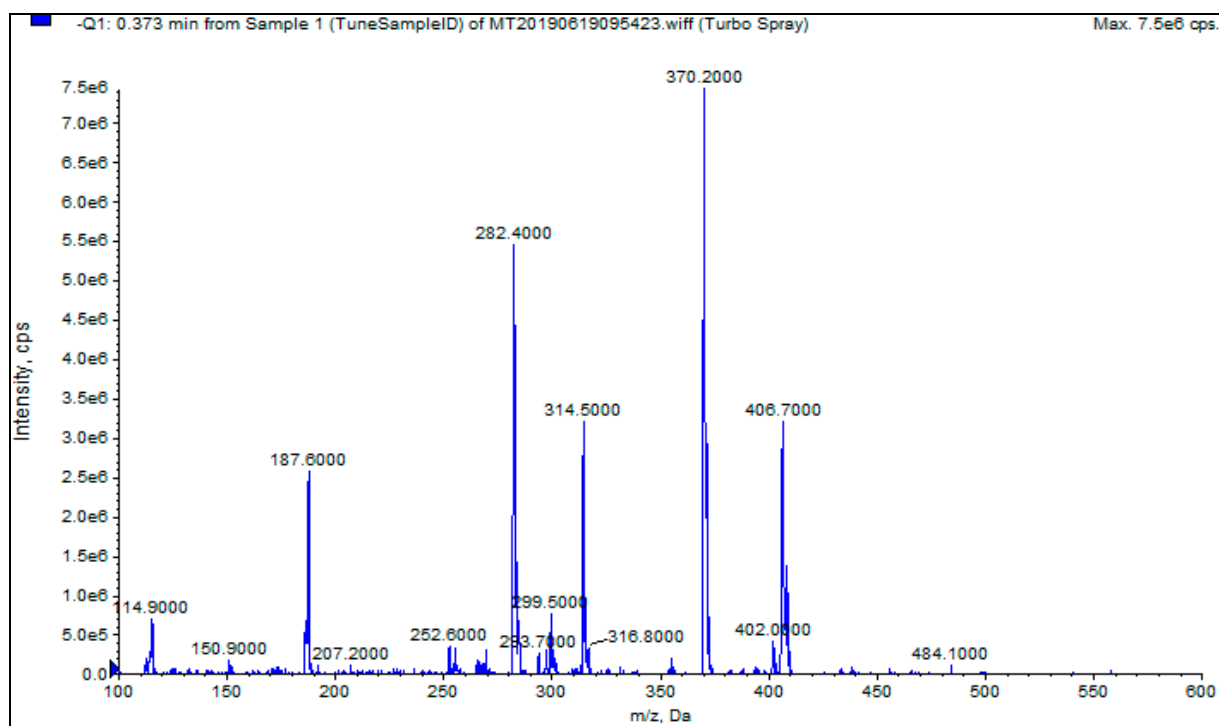

**Figure S52.** Mass spectrum of racemate **26** recorded in negative ionization mode.  
(solvent: CH<sub>3</sub>CN)

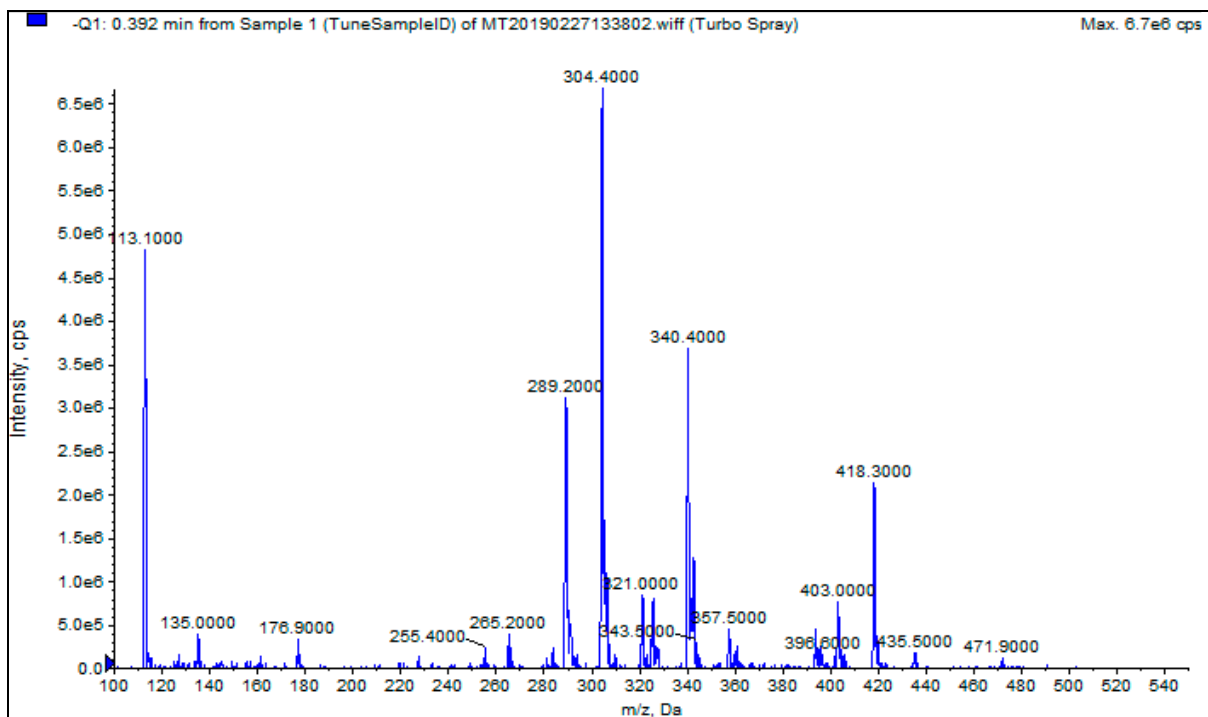

**Figure S53.** Mass spectrum of racemate **27** recorded in negative ionization mode.  
(solvent: CH<sub>3</sub>CN)

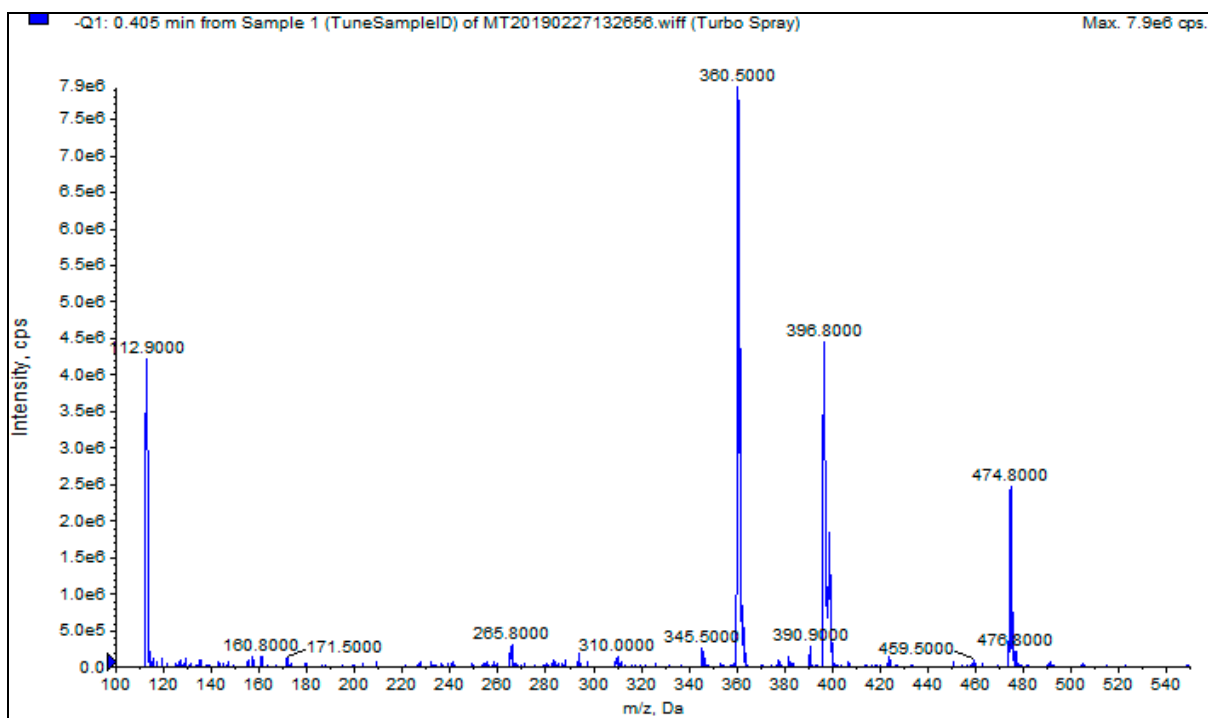

**Figure S54.** Mass spectrum of racemate **28** recorded in negative ionization mode.  
(solvent: CH<sub>3</sub>CN)

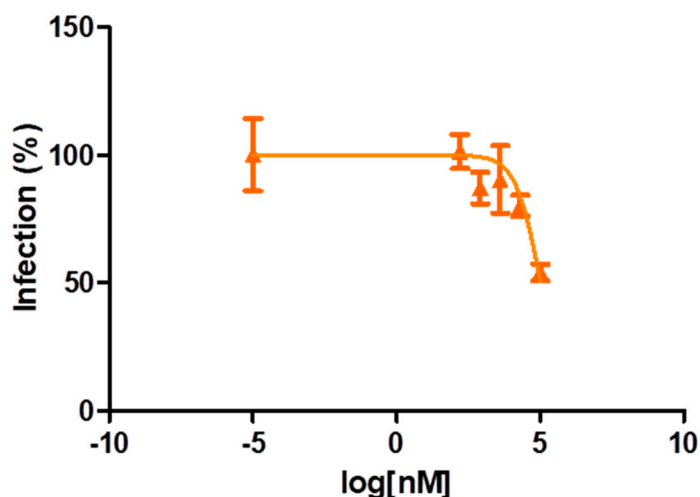

**Figure S55.** Compound **9** inhibits HIV-1 infection using the pseudotype virus assay at the non-cytotoxic concentration of 100  $\mu\text{M}$ . Two independent experiments were performed in triplicates.

**Table S1.** Cytotoxicity of compounds **2-14** and **21-28** on U373-CD4-CCR5 cells,  $n=2$ . Compounds were tested up to 100  $\mu\text{M}$  except for compound **9** whose cytotoxicity evaluation was repeated up to a maximum concentration of 500  $\mu\text{M}$ . Both chemical strategies (B-ring saturation and 4'-oxime formation) allowed us to successfully decrease the cytotoxicity of protoflavones.

| Compound  | Compound type                   | Cytotoxic $\text{IC}_{50} \pm \text{SEM}$ [ $\mu\text{M}$ ] |
|-----------|---------------------------------|-------------------------------------------------------------|
| <b>2</b>  | protoflavone                    | $0.22 \pm 0.003$                                            |
| <b>6</b>  | protoflavone                    | $2.09 \pm 0.13$                                             |
| <b>7</b>  | protoflavone                    | $0.25 \pm 0.002$                                            |
| <b>8</b>  | protoflavone                    | $0.67 \pm 0.03$                                             |
| <b>9</b>  | tetrahydroprotoflavone          | > 500                                                       |
| <b>10</b> | tetrahydroprotoflavone          | > 100                                                       |
| <b>11</b> | tetrahydroprotoflavone          | > 100                                                       |
| <b>12</b> | tetrahydroprotoflavone          | > 100                                                       |
| <b>13</b> | tetrahydroprotoflavone          | > 100                                                       |
| <b>14</b> | tetrahydroprotoflavone          | $\sim 6.37$                                                 |
| <b>21</b> | dihydroprotoflavone 4'-oxime    | > 100                                                       |
| <b>22</b> | dihydroprotoflavone 4'-oxime    | > 100                                                       |
| <b>23</b> | dihydroprotoflavone 4'-oxime    | $\sim 89.45$                                                |
| <b>24</b> | dihydroprotoflavone 4'-oxime    | > 100                                                       |
| <b>25</b> | dihydroprotoflavone 4'-oxime    | $53.88 \pm 0.35$                                            |
| <b>26</b> | dihydroprotoflavone 4'-oxime    | > 100                                                       |
| <b>27</b> | tetrahydroprotoflavone 4'-oxime | > 100                                                       |
| <b>28</b> | tetrahydroprotoflavone 4'-oxime | $27.02 \pm 8.4$                                             |
